# Supplementary material for: CSF tau phosphorylation occupancies at T217 and T205 represent improved biomarkers of amyloid and tau pathology in Alzheimer’s disease
Source: PubMed Central journal article supplement (PMC10154225; doi:10.1038/s43587-023-00380-7), 2023-03-13
Supplement: 43587_2023_380_MOESM1_ESM.pdf [file 43587_2023_380_MOESM1_ESM.pdf]

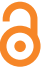

---

# **CSF tau phosphorylation occupancies at T217 and T205 represent improved biomarkers of amyloid and tau pathology in Alzheimer's disease**

---

In the format provided by the authors and unedited

## Supplementary information

### Table of Contents

| <b>Supplementary figures</b>                                                                                                                                                         | <b>page</b> |
|--------------------------------------------------------------------------------------------------------------------------------------------------------------------------------------|-------------|
| Supplemental Figure 1. Distribution of tau PET summary measure values.                                                                                                               | 3           |
| <br>                                                                                                                                                                                 |             |
| <b>Participant characteristics</b>                                                                                                                                                   |             |
| Supplemental Table 1. Participant characteristics for the Knight ADRC tau PET symptomatic AD sub-cohort.                                                                             | 4           |
| <br>                                                                                                                                                                                 |             |
| <b>Associations with amyloid PET</b>                                                                                                                                                 |             |
| Supplemental Table 2. CSF tau measures for individuals in the Knight ADRC amyloid PET cohort with no missing CSF biomarker measures.                                                 | 5           |
| Supplemental Table 3. Correspondence of CSF measures with the amyloid PET status in the Knight ADRC amyloid PET cohort.                                                              | 6           |
| Supplemental Table 4. Correlations between CSF biomarkers and amyloid PET Centiloid in the Knight ADRC amyloid PET cohort.                                                           | 7           |
| Supplemental Table 5. Correlations between CSF biomarkers and amyloid PET Centiloid for individuals in the Knight ADRC amyloid PET cohort with no missing CSF biomarker measures.    | 8           |
| Supplemental Table 6. Correlations between CSF biomarkers and amyloid PET Centiloid for amyloid PET positive individuals in the Knight ADRC amyloid PET cohort.                      | 9           |
| <br>                                                                                                                                                                                 |             |
| <b>Associations with the tau PET summary measure</b>                                                                                                                                 |             |
| Supplemental Table 7. CSF tau measures for the Knight ADRC tau PET cohort.                                                                                                           | 10          |
| Supplemental Table 8. CSF tau measures for individuals in the Knight ADRC tau PET cohort with no missing CSF biomarker measures.                                                     | 11          |
| Supplemental Table 9. Correspondence of CSF measures with the tau PET summary measure in the Knight ADRC tau PET cohort.                                                             | 12          |
| Supplemental Table 10. Correspondence of CSF measures with the tau PET summary measure for amyloid PET positive individuals in the Knight ADRC tau PET cohort.                       | 13          |
| Supplemental Table 11. Identification of individuals in the Knight ADRC tau PET cohort who are both tau PET positive and amyloid PET positive.                                       | 14          |
| Supplemental Table 12. Correlations between CSF biomarkers and the tau PET summary measure in the Knight ADRC tau PET cohort.                                                        | 15          |
| Supplemental Table 13. Correlations between CSF biomarkers and the tau PET summary measure for individuals in the Knight ADRC tau PET cohort with no missing CSF biomarker measures. | 16          |
| Supplemental Table 14. Correlations between CSF biomarkers and the tau PET summary measure for amyloid PET positive individuals in the Knight ADRC tau PET cohort.                   | 17          |
| <br>                                                                                                                                                                                 |             |
| <b>Associations with regional tau PET</b>                                                                                                                                            |             |
| Supplemental Table 15. Correlations between CSF pT205/T205 and regional tau PET for amyloid PET positive individuals in the Knight ADRC tau PET cohort.                              | 18          |
| Supplemental Table 16. Correlations between CSF pT217/T217 and regional tau PET for amyloid PET positive individuals in the Knight ADRC tau PET cohort.                              | 19          |
| Supplemental Table 17. Correlations between CSF pT181/T181 and regional tau PET for amyloid PET positive individuals in the Knight ADRC tau PET cohort.                              | 20          |
| Supplemental Table 18. Correlations between CSF pT231/T231 and regional tau PET for amyloid PET positive individuals in the Knight ADRC tau PET cohort.                              | 21          |
| <br>                                                                                                                                                                                 |             |
| <b>Associations with regional brain volumes</b>                                                                                                                                      |             |
| Supplemental Table 19. Correlations between CSF pT205/T205 and regional brain volumes for amyloid PET positive individuals in the Knight ADRC amyloid PET cohort.                    | 22          |
| Supplemental Table 20. Correlations between CSF pT217/T217 and regional brain volumes                                                                                                | 23          |

|                                                                                                                                                                                      |    |
|--------------------------------------------------------------------------------------------------------------------------------------------------------------------------------------|----|
| for amyloid PET positive individuals in the Knight ADRC amyloid PET cohort.                                                                                                          |    |
| Supplemental Table 21. Correlations between CSF pT181/T181 and regional brain volumes for amyloid PET positive individuals in the Knight ADRC amyloid PET cohort.                    | 24 |
| Supplemental Table 22. Correlations between CSF pT231/T231 and regional brain volumes for amyloid PET positive individuals in the Knight ADRC amyloid PET cohort.                    | 25 |
| <b>Associations with clinical dementia symptoms</b>                                                                                                                                  |    |
| Supplemental Table 23. Correspondence of CSF measures with clinical status in the Knight ADRC amyloid PET cohort.                                                                    | 26 |
| Supplemental Table 24. Correspondence of CSF measures with clinical status in the amyloid PET positive individuals in the Knight ADRC amyloid PET cohort.                            | 27 |
| Supplemental Table 25. Correlations between biomarker measures and Clinical Dementia Rating Sum of Boxes for the Knight ADRC amyloid PET cohort.                                     | 28 |
| Supplemental Table 26. Correlations between biomarker measures and Clinical Dementia Rating Sum of Boxes for amyloid PET positive individuals in the Knight ADRC amyloid PET cohort. | 29 |
| <b>Associations in cognitively impaired individuals</b>                                                                                                                              |    |
| Supplemental Table 27. CSF tau measures for cognitively impaired individuals in the Knight ADRC tau PET cohort.                                                                      | 30 |
| Supplemental Table 28. Correlations between CSF biomarkers and amyloid PET Centiloid for cognitively impaired individuals in the Knight ADRC tau PET cohort.                         | 31 |
| Supplemental Table 29. Correlations between CSF biomarkers and the tau PET summary measure for cognitively impaired individuals in the Knight ADRC tau PET cohort.                   | 32 |
| Supplemental Table 30. Correlations between CSF biomarkers and amyloid PET Centiloid for individuals in the BioFINDER-2 cohort.                                                      | 33 |
| Supplemental Table 31. Correlations between CSF biomarkers and tau PET for Braak I-IV regions for individuals in BioFINDER-2 cohort.                                                 | 34 |
| Supplemental Table 32. Correlations between CSF biomarkers and tau PET for Braak V-VI regions for individuals in BioFINDER-2 cohort.                                                 | 35 |
| <b>Appendix</b>                                                                                                                                                                      |    |
| Appendix 1. Assay methodology, quality control, and performance.                                                                                                                     | 36 |

**Supplemental Figure 1. Distribution of tau PET summary measure values.** Data from the baseline tau PET scan were examined from individuals enrolled in studies at the Knight Alzheimer Disease Research Center. This data overlaps with tau PET cohort (**Supplemental Table 1**), but two additional individuals were included in this analysis who did not have an amyloid PET scan and/or CSF data. At the time of the baseline tau PET scan, the individuals had the following Clinical Dementia Rating (CDR): CDR 0, n=314; CDR 0.5, n=46; CDR 1, n=12; CDR 2, n=1. The tau PET summary measure was calculated as described in the methods. Gaussian mixture modeling was implemented in R using the mclust software package and found a normal (blue dashed line) and abnormal (red dashed line) cluster. The value at which there was equal probability of belonging to either group was 1.52 (black dashed line), which was used as the cut-off value for tau PET positivity.

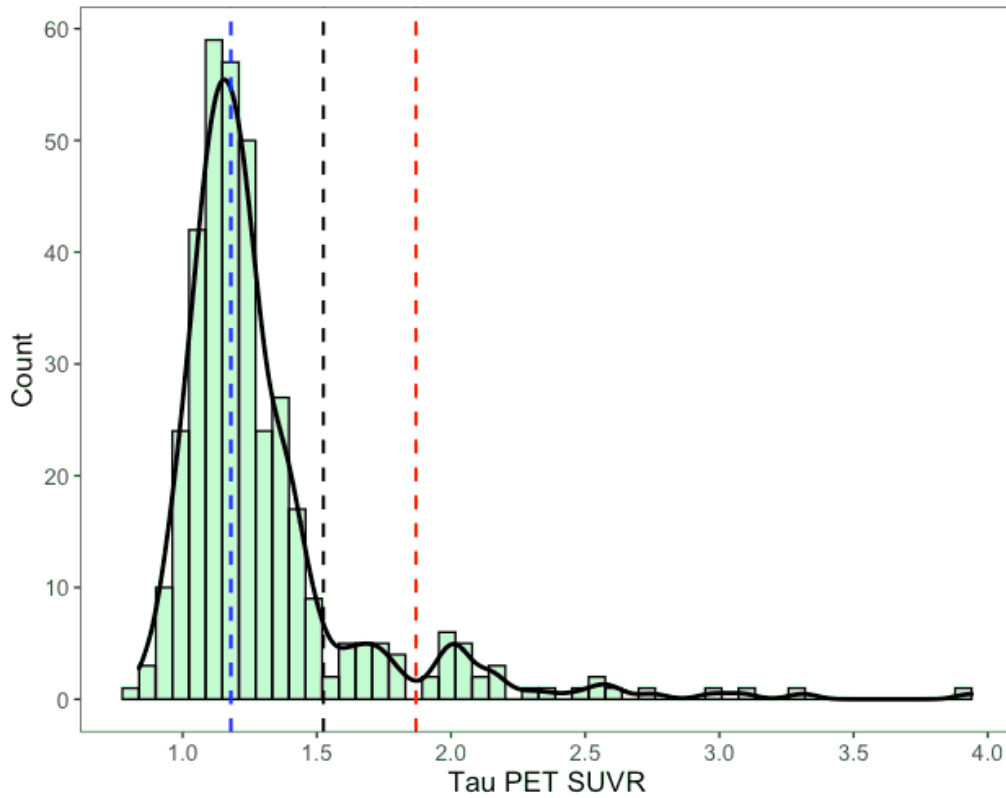

**Supplemental Table 1. Participant characteristics for the Knight ADRC tau PET symptomatic AD sub-cohort.** Continuous values are presented as the median with the interquartile range. The significance of differences by tau PET status were evaluated with Wilcoxon ranked sum tests for continuous variables and Chi-Square or Fisher exact tests for categorical variables. All tests were two-sided and were not adjusted for multiple comparisons.

| Characteristic                                          | All (n=55)             | Tau PET Negative (n=20) | Tau PET Positive (n=35) | p=      |
|---------------------------------------------------------|------------------------|-------------------------|-------------------------|---------|
| <b>Demographics</b>                                     |                        |                         |                         |         |
| Age at CSF collection (years)                           | 75.5 (70.9-79.2)       | 72.4 (71.3-77.2)        | 75.9 (70.6-79.2)        | 0.58    |
| Gender (n, % female)                                    | 23, 42%                | 5, 25%                  | 18, 51%                 | 0.06    |
| APOE ε4 carrier status (n, % ε4 carrier)                | 30, 55%                | 8, 40%                  | 22, 63%                 | 0.14    |
| CDR (0/0.5/1+)                                          | 0/41/14                | 0/22/13                 | 0/19/1                  | 0.03    |
| CDR-SB                                                  | 2.5 (1.5-4)            | 2 (1.5-2.5)             | 3.5 (1.5-5)             | 0.02    |
| Years of education                                      | 16 (13-18)             | 16 (12-18)              | 16 (13-18)              | 0.91    |
| <b>CSF Lumipulse measures</b>                           |                        |                         |                         |         |
| Aβ42 (pg/ml)                                            | 526 (365-640)          | 738 (528-927)           | 471 (323-535)           | <0.0001 |
| Aβ40 (pg/ml)                                            | 11600 (8870-13400)     | 12700 (9950-14200)      | 11200 (8800-13200)      | 0.08    |
| Aβ42/Aβ40                                               | 0.0457 (0.0383-0.0539) | 0.0575 (0.0457-0.0703)  | 0.0438 (0.0359-0.0468)  | <0.0001 |
| Total tau (pg/ml)                                       | 509 (414-686)          | 443 (320-506)           | 623 (453-710)           | 0.006   |
| p-tau181 (pg/ml)                                        | 74.9 (55.2-98.3)       | 55.2 (35.3-71.4)        | 92.6 (68.5-109)         | 0.0002  |
| <b>Amyloid and tau PET measures</b>                     |                        |                         |                         |         |
| Amyloid PET status (n, % positive)                      | 45, 82%                | 10, 50%                 | 35, 100%                | <0.0001 |
| Amyloid PET Centiloid                                   | 78.7 (47.1-100)        | 19.2 (3.4-55)           | 88.2 (77.1-107)         | <0.0001 |
| Interval between CSF collection and amyloid PET (years) | 0.19 (0.05-0.31)       | 0.15 (0.05-0.29)        | 0.19 (0.04-0.33)        | 0.98    |
| Tau PET Summary Measure                                 | 1.82 (1.29-2.13)       | 1.23 (1.14-1.33)        | 2.04 (1.95-2.28)        | <0.0001 |
| Interval between CSF collection and tau PET (years)     | 0.20 (0.06-0.29)       | 0.20 (0.05-0.35)        | 0.194 (0.06-0.25)       | 0.42    |

**Abbreviations:** CSF, cerebrospinal fluid; CDR, Clinical Dementia Rating; CDR-SB, Clinical Dementia Rating Sum of Boxes; PET, positron emission tomography; PIB, <sup>11</sup>C-Pittsburgh Compound B; SUVR, standardized uptake value ratio.

**Supplemental Table 2. CSF tau measures for individuals in the Knight ADRC amyloid PET cohort with no missing CSF biomarker measures.** Continuous values are presented as the median with the interquartile range. The significance of differences by amyloid PET status were evaluated with Wilcoxon ranked sum tests for continuous variables and Chi-Square or Fisher exact tests for categorical variables. The fold difference is the median biomarker value in the amyloid PET positive group divided by the median value in the amyloid PET negative group. All tests were two-sided and were not adjusted for multiple comparisons.

| Characteristic                                                    | Entire cohort<br>(n=554) | Amyloid PET negative<br>(n=323) | Amyloid PET positive<br>(n=231) | Fold<br>difference | p=      |
|-------------------------------------------------------------------|--------------------------|---------------------------------|---------------------------------|--------------------|---------|
| <b>Phosphorylation occupancies by mass spectrometry</b>           |                          |                                 |                                 |                    |         |
| pT111/T111 (%)                                                    | 3.73 (2.46-7.49)         | 2.72 (2.13-3.37)                | 8.13 (6.15-10.4)                | 2.99               | <0.0001 |
| pT153/T153 (%)                                                    | 0.0634 (0.0335-0.129)    | 0.0371 (0.0216-0.0599)          | 0.139 (0.0996-0.195)            | 3.75               | <0.0001 |
| pT175/T175 (%)                                                    | 0.473 (0.395-0.552)      | 0.491 (0.415-0.559)             | 0.456 (0.376-0.533)             | 0.93               | 0.0001  |
| pT181/T181 (%)                                                    | 30.1 (27.9-34.6)         | 28.5 (27.1-29.9)                | 35.5 (32.2-39.6)                | 1.25               | <0.0001 |
| pS199/S199 (%)                                                    | 0.682 (0.551-0.877)      | 0.639 (0.51-0.808)              | 0.741 (0.626-0.932)             | 1.16               | <0.0001 |
| pS202/S202 (%)                                                    | 5.44 (4.51-6.39)         | 5.66 (4.74-6.65)                | 5.02 (4.22-6)                   | 0.89               | <0.0001 |
| pT205/T205 (%)                                                    | 1.01 (0.829-1.29)        | 0.896 (0.757-1.06)              | 1.29 (1.02-1.59)                | 1.44               | <0.0001 |
| pS208/S208 (%)                                                    | 0.15 (0.092-0.263)       | 0.106 (0.0752-0.145)            | 0.276 (0.208-0.35)              | 2.60               | <0.0001 |
| pT217/T217 (%)                                                    | 4.05 (3.12-8.41)         | 3.23 (2.91-3.59)                | 9.4 (6.68-12.7)                 | 2.91               | <0.0001 |
| pT231/T231 (%)                                                    | 9.86 (4.38-22.8)         | 5.7 (2.37-9.23)                 | 24.9 (15.6-31.3)                | 4.37               | <0.0001 |
| <b>Phosphorylated tau concentrations by mass spectrometry</b>     |                          |                                 |                                 |                    |         |
| p-tau153 (pg/ml)                                                  | 1.3 (0.622-3.35)         | 0.726 (0.378-1.17)              | 4.02 (2.16-6.58)                | 5.54               | <0.0001 |
| p-tau175 (pg/ml)                                                  | 11.7 (8.59-15.9)         | 10.5 (8.09-14.2)                | 13.6 (9.79-17.3)                | 1.30               | <0.0001 |
| p-tau181 (pg/ml)                                                  | 747 (554-1110)           | 629 (478-787)                   | 1080 (783-1400)                 | 1.72               | <0.0001 |
| p-tau199 (pg/ml)                                                  | 18.5 (13.3-26)           | 15.9 (10.9-20.2)                | 25.5 (18.3-32.8)                | 1.60               | <0.0001 |
| p-tau202 (pg/ml)                                                  | 145 (118-181)            | 132 (111-158)                   | 164 (136-201)                   | 1.24               | <0.0001 |
| p-tau205 (pg/ml)                                                  | 25.4 (19.4-38.9)         | 21.2 (17.3-25.9)                | 41 (29.4-58.3)                  | 1.93               | <0.0001 |
| p-tau208 (pg/ml)                                                  | 3.77 (2.16-7.82)         | 2.49 (1.62-3.58)                | 8.98 (5.69-13.3)                | 3.61               | <0.0001 |
| p-tau217 (pg/ml)                                                  | 79.3 (49.7-180)          | 53.6 (41.7-71.8)                | 200 (124-294)                   | 3.73               | <0.0001 |
| p-tau231 (pg/ml)                                                  | 23.2 (8.59-68.8)         | 10.7 (4.14-21.2)                | 75.6 (43.9-130)                 | 7.07               | <0.0001 |
| <b>Non-phosphorylated tau concentrations by mass spectrometry</b> |                          |                                 |                                 |                    |         |
| Tau151-155 (ng/ml)                                                | 2.17 (1.7-3.03)          | 1.94 (1.55-2.38)                | 2.81 (2.15-3.49)                | 1.45               | <0.0001 |
| Tau181-190 (ng/ml)                                                | 2.48 (1.92-3.27)         | 2.2 (1.75-2.77)                 | 3.02 (2.33-3.7)                 | 1.37               | <0.0001 |
| Tau195-210 (ng/ml)                                                | 2.65 (2.08-3.53)         | 2.38 (1.87-2.89)                | 3.36 (2.58-4.17)                | 1.41               | <0.0001 |
| Tau212-221 (ng/ml)                                                | 1.8 (1.43-2.38)          | 1.65 (1.31-2.01)                | 2.14 (1.69-2.69)                | 1.30               | <0.0001 |
| Tau226-230 (ng/ml)                                                | 0.239 (0.18-0.339)       | 0.203 (0.158-0.259)             | 0.325 (0.239-0.442)             | 1.60               | <0.0001 |

**Supplemental Table 3. Correspondence of CSF measures with the amyloid PET status in the Knight ADRC amyloid PET cohort.** The receiver operating characteristic area under the curve of CSF measures with amyloid PET status is shown with 95% confidence intervals. The cut-off for the CSF measures that best distinguished amyloid PET status, as well as the positive percent agreement (PPA) and negative percent agreement (NPA) of the cut-off for amyloid PET status, are shown. CSF measures are listed in order of correspondence with amyloid PET status, stratified by measure type.

| Analyte                                                           | AUC (95% CI)     | Cut-off | PPA  | NPA  |
|-------------------------------------------------------------------|------------------|---------|------|------|
| <b>CSF Lumipulse measures</b>                                     |                  |         |      |      |
| A $\beta$ 42/A $\beta$ 40                                         | 0.97 (0.95-0.98) | 0.0673  | 0.97 | 0.88 |
| p-tau181 (pg/ml)                                                  | 0.89 (0.86-0.91) | 42.9    | 0.83 | 0.82 |
| A $\beta$ 42 (pg/ml)                                              | 0.87 (0.84-0.89) | 661     | 0.82 | 0.80 |
| Total tau (pg/ml)                                                 | 0.83 (0.80-0.86) | 338     | 0.75 | 0.79 |
| A $\beta$ 40 (pg/ml)                                              | 0.56 (0.52-0.60) | 10801   | 0.59 | 0.54 |
| <b>Phosphorylation occupancies by mass spectrometry</b>           |                  |         |      |      |
| pT217/T217 (%)                                                    | 0.98 (0.97-0.99) | 4.51    | 0.96 | 0.93 |
| pT111/T111 (%)                                                    | 0.96 (0.94-0.97) | 4.41    | 0.84 | 0.94 |
| pT231/T231 (%)                                                    | 0.93 (0.91-0.95) | 12.8    | 0.84 | 0.92 |
| pT153/T153 (%)                                                    | 0.93 (0.90-0.95) | 0.0770  | 0.84 | 0.90 |
| pS208/S208 (%)                                                    | 0.92 (0.90-0.94) | 0.178   | 0.82 | 0.89 |
| pT181/T181 (%)                                                    | 0.91 (0.89-0.94) | 31.4    | 0.79 | 0.91 |
| pT205/T205 (%)                                                    | 0.80 (0.77-0.84) | 1.08    | 0.72 | 0.77 |
| pS202/S202 (%)                                                    | 0.66 (0.61-0.70) | 5.19    | 0.56 | 0.70 |
| pS199/S199 (%)                                                    | 0.63 (0.59-0.67) | 0.611   | 0.76 | 0.48 |
| pT175/T175 (%)                                                    | 0.54 (0.49-0.58) | 0.486   | 0.64 | 0.46 |
| <b>Phosphorylated tau concentrations by mass spectrometry</b>     |                  |         |      |      |
| p-tau217 (pg/ml)                                                  | 0.95 (0.93-0.96) | 81.8    | 0.90 | 0.87 |
| p-tau231 (pg/ml)                                                  | 0.94 (0.92-0.95) | 34.9    | 0.81 | 0.93 |
| p-tau208 (pg/ml)                                                  | 0.93 (0.91-0.95) | 3.76    | 0.90 | 0.82 |
| p-tau153 (pg/ml)                                                  | 0.92 (0.90-0.94) | 1.72    | 0.82 | 0.89 |
| p-tau205 (pg/ml)                                                  | 0.88 (0.85-0.91) | 28.3    | 0.75 | 0.87 |
| p-tau181 (pg/ml)                                                  | 0.83 (0.80-0.86) | 825     | 0.70 | 0.84 |
| p-tau199 (pg/ml)                                                  | 0.78 (0.75-0.82) | 18.2    | 0.73 | 0.70 |
| p-tau202 (pg/ml)                                                  | 0.73 (0.69-0.76) | 139     | 0.73 | 0.64 |
| p-tau175 (pg/ml)                                                  | 0.67 (0.63-0.71) | 11.6    | 0.65 | 0.67 |
| <b>Non-phosphorylated tau concentrations by mass spectrometry</b> |                  |         |      |      |
| Tau151-155 (ng/ml)                                                | 0.79 (0.75-0.82) | 2.18    | 0.72 | 0.74 |
| Tau195-210 (ng/ml)                                                | 0.78 (0.75-0.82) | 2.75    | 0.68 | 0.77 |
| Tau226-230 (ng/ml)                                                | 0.78 (0.75-0.82) | 0.236   | 0.74 | 0.71 |
| Tau181-190 (ng/ml)                                                | 0.75 (0.72-0.79) | 2.53    | 0.67 | 0.74 |
| Tau212-221 (ng/ml)                                                | 0.74 (0.71-0.78) | 1.82    | 0.67 | 0.72 |

**Supplemental Table 4. Correlations between CSF biomarkers and amyloid PET Centiloid in the Knight ADRC amyloid PET cohort.** The Spearman correlation and partial Spearman correlation after adjusting for age and sex are shown. CSF measures are shown in order of the absolute value of their correlation with amyloid PET Centiloid, stratified by measure type. All tests were two-sided and were not adjusted for multiple comparisons.

| Measure                                                           | n=  | Spearman $\rho$        | p=      | Partial Spearman $\rho$ | p=      |
|-------------------------------------------------------------------|-----|------------------------|---------|-------------------------|---------|
| <b>CSF Lumipulse measures</b>                                     |     |                        |         |                         |         |
| A $\beta$ 42/A $\beta$ 40                                         | 750 | -0.74 (-0.77 to -0.71) | <0.0001 | -0.71 (-0.74 to -0.67)  | <0.0001 |
| p-tau181 (pg/ml)                                                  | 750 | 0.61 (0.57 to 0.65)    | <0.0001 | 0.56 (0.51 to 0.61)     | <0.0001 |
| A $\beta$ 42 (pg/ml)                                              | 750 | -0.56 (-0.61 to -0.51) | <0.0001 | -0.54 (-0.59 to -0.49)  | <0.0001 |
| Total tau (pg/ml)                                                 | 750 | 0.51 (0.45 to 0.56)    | <0.0001 | 0.44 (0.38 to 0.50)     | <0.0001 |
| A $\beta$ 40 (pg/ml)                                              | 750 | 0.09 (0.02 to 0.16)    | 0.01    | 0.05 (-0.02 to 0.12)    | 0.15    |
| <b>Phosphorylation occupancies by mass spectrometry</b>           |     |                        |         |                         |         |
| pT217/T217 (%)                                                    | 750 | 0.76 (0.73 to 0.79)    | <0.0001 | 0.74 (0.70 to 0.77)     | <0.0001 |
| pT111/T111 (%)                                                    | 746 | 0.72 (0.68 to 0.75)    | <0.0001 | 0.69 (0.65 to 0.73)     | <0.0001 |
| pT231/T231 (%)                                                    | 620 | 0.70 (0.66 to 0.74)    | <0.0001 | 0.67 (0.63 to 0.71)     | <0.0001 |
| pT153/T153 (%)                                                    | 660 | 0.70 (0.65 to 0.73)    | <0.0001 | 0.66 (0.62 to 0.70)     | <0.0001 |
| pS208/S208 (%)                                                    | 685 | 0.68 (0.64 to 0.72)    | <0.0001 | 0.66 (0.61 to 0.70)     | <0.0001 |
| pT181/T181 (%)                                                    | 747 | 0.66 (0.62 to 0.70)    | <0.0001 | 0.63 (0.59 to 0.67)     | <0.0001 |
| pT205/T205 (%)                                                    | 749 | 0.47 (0.41 to 0.52)    | <0.0001 | 0.42 (0.35 to 0.47)     | <0.0001 |
| pS202/S202 (%)                                                    | 750 | -0.25 (-0.31 to -0.18) | <0.0001 | 0.16 (0.09 to 0.23)     | <0.0001 |
| pS199/S199 (%)                                                    | 743 | 0.19 (0.12 to 0.26)    | <0.0001 | -0.22 (-0.28 to -0.15)  | <0.0001 |
| pT175/T175 (%)                                                    | 734 | -0.07 (-0.14 to 0.00)  | 0.05    | -0.07 (-0.14 to 0.00)   | 0.05    |
| <b>Phosphorylated tau concentrations by mass spectrometry</b>     |     |                        |         |                         |         |
| p-tau217 (pg/ml)                                                  | 750 | 0.71 (0.67 to 0.74)    | <0.0001 | 0.67 (0.62 to 0.70)     | <0.0001 |
| p-tau231 (pg/ml)                                                  | 619 | 0.71 (0.67 to 0.75)    | <0.0001 | 0.67 (0.63 to 0.71)     | <0.0001 |
| p-tau208 (pg/ml)                                                  | 685 | 0.70 (0.67 to 0.74)    | <0.0001 | 0.67 (0.62 to 0.71)     | <0.0001 |
| p-tau153 (pg/ml)                                                  | 660 | 0.69 (0.65 to 0.73)    | <0.0001 | 0.65 (0.60 to 0.69)     | <0.0001 |
| p-tau205 (pg/ml)                                                  | 749 | 0.59 (0.54 to 0.64)    | <0.0001 | 0.53 (0.48 to 0.58)     | <0.0001 |
| p-tau181 (pg/ml)                                                  | 747 | 0.52 (0.46 to 0.57)    | <0.0001 | 0.46 (0.40 to 0.51)     | <0.0001 |
| p-tau199 (pg/ml)                                                  | 743 | 0.44 (0.38 to 0.50)    | <0.0001 | 0.37 (0.31 to 0.44)     | <0.0001 |
| p-tau202 (pg/ml)                                                  | 750 | 0.36 (0.30 to 0.42)    | <0.0001 | 0.29 (0.22 to 0.35)     | <0.0001 |
| p-tau175 (pg/ml)                                                  | 734 | 0.26 (0.19 to 0.33)    | <0.0001 | 0.20 (0.13 to 0.27)     | <0.0001 |
| <b>Non-phosphorylated tau concentrations by mass spectrometry</b> |     |                        |         |                         |         |
| Tau226-230 (ng/ml)                                                | 719 | 0.46 (0.40 to 0.51)    | <0.0001 | 0.40 (0.34 to 0.46)     | <0.0001 |
| Tau151-155 (ng/ml)                                                | 747 | 0.45 (0.39 to 0.51)    | <0.0001 | 0.38 (0.32 to 0.44)     | <0.0001 |
| Tau195-210 (ng/ml)                                                | 750 | 0.45 (0.39 to 0.50)    | <0.0001 | 0.38 (0.32 to 0.44)     | <0.0001 |
| Tau181-190 (ng/ml)                                                | 750 | 0.40 (0.34 to 0.46)    | <0.0001 | 0.32 (0.26 to 0.39)     | <0.0001 |
| Tau212-221 (ng/ml)                                                | 750 | 0.38 (0.32 to 0.44)    | <0.0001 | 0.38 (0.32 to 0.44)     | <0.0001 |



**Supplemental Table 5. Correlations between CSF biomarkers and amyloid PET Centiloid for individuals in the Knight ADRC amyloid PET cohort with no missing CSF biomarker measures.** The Spearman correlation and partial Spearman correlation after adjusting for age and sex are shown. CSF measures are shown in order of the absolute value of their correlation with amyloid PET Centiloid, stratified by measure type. All tests were two-sided and were not adjusted for multiple comparisons.

| Measure                                                           | Spearman $\rho$        | p=      | Partial Spearman $\rho$ | p=      |
|-------------------------------------------------------------------|------------------------|---------|-------------------------|---------|
| <b>CSF Lumipulse measures</b>                                     |                        |         |                         |         |
| A $\beta$ 42/A $\beta$ 40                                         | -0.78 (-0.81 to -0.75) | <0.0001 | -0.76 (-0.79 to -0.72)  | <0.0001 |
| A $\beta$ 42 (pg/ml)                                              | -0.66 (-0.70 to -0.60) | <0.0001 | -0.63 (-0.68 to -0.58)  | <0.0001 |
| p-tau181 (pg/ml)                                                  | 0.63 (0.57 to 0.67)    | <0.0001 | 0.58 (0.52 to 0.63)     | <0.0001 |
| Total tau (pg/ml)                                                 | 0.50 (0.43 to 0.56)    | <0.0001 | 0.43 (0.36 to 0.50)     | <0.0001 |
| A $\beta$ 40 (pg/ml)                                              | 0.01 (-0.07 to 0.09)   | 0.79    | -0.02 (-0.10 to 0.06)   | 0.63    |
| <b>Phosphorylation occupancies by mass spectrometry</b>           |                        |         |                         |         |
| pT217/T217 (%)                                                    | 0.81 (0.78 to 0.83)    | <0.0001 | 0.78 (0.75 to 0.81)     | <0.0001 |
| pT111/T111 (%)                                                    | 0.76 (0.73 to 0.80)    | <0.0001 | 0.74 (0.70 to 0.78)     | <0.0001 |
| pT153/T153 (%)                                                    | 0.72 (0.68 to 0.76)    | <0.0001 | 0.69 (0.65 to 0.74)     | <0.0001 |
| pT231/T231 (%)                                                    | 0.72 (0.67 to 0.76)    | <0.0001 | 0.69 (0.64 to 0.73)     | <0.0001 |
| pS208/S208 (%)                                                    | 0.71 (0.67 to 0.75)    | <0.0001 | 0.68 (0.63 to 0.72)     | <0.0001 |
| pT181/T181 (%)                                                    | 0.70 (0.66 to 0.74)    | <0.0001 | 0.68 (0.64 to 0.72)     | <0.0001 |
| pT205/T205 (%)                                                    | 0.54 (0.47 to 0.59)    | <0.0001 | 0.49 (0.43 to 0.55)     | <0.0001 |
| pS199/S199 (%)                                                    | 0.21 (0.13 to 0.29)    | <0.0001 | 0.18 (0.09 to 0.26)     | <0.0001 |
| pS202/S202 (%)                                                    | -0.20 (-0.28 to -0.12) | <0.0001 | -0.18 (-0.26 to -0.09)  | <0.0001 |
| pT175/T175 (%)                                                    | -0.17 (-0.25 to -0.09) | <0.0001 | -0.15 (-0.23 to -0.07)  | 0.0004  |
| <b>Phosphorylated tau concentrations by mass spectrometry</b>     |                        |         |                         |         |
| p-tau217 (pg/ml)                                                  | 0.74 (0.70 to 0.77)    | <0.0001 | 0.70 (0.66 to 0.74)     | <0.0001 |
| p-tau231 (pg/ml)                                                  | 0.72 (0.68 to 0.76)    | <0.0001 | 0.69 (0.64 to 0.73)     | <0.0001 |
| p-tau208 (pg/ml)                                                  | 0.72 (0.67 to 0.76)    | <0.0001 | 0.68 (0.63 to 0.72)     | <0.0001 |
| p-tau153 (pg/ml)                                                  | 0.71 (0.66 to 0.74)    | <0.0001 | 0.67 (0.62 to 0.71)     | <0.0001 |
| p-tau205 (pg/ml)                                                  | 0.62 (0.57 to 0.67)    | <0.0001 | 0.56 (0.50 to 0.62)     | <0.0001 |
| p-tau181 (pg/ml)                                                  | 0.51 (0.45 to 0.57)    | <0.0001 | 0.45 (0.39 to 0.52)     | <0.0001 |
| p-tau199 (pg/ml)                                                  | 0.45 (0.38 to 0.51)    | <0.0001 | 0.38 (0.31 to 0.45)     | <0.0001 |
| p-tau202 (pg/ml)                                                  | 0.36 (0.29 to 0.43)    | <0.0001 | 0.29 (0.21 to 0.36)     | <0.0001 |
| p-tau175 (pg/ml)                                                  | 0.20 (0.12 to 0.28)    | <0.0001 | 0.15 (0.07 to 0.23)     | 0.0004  |
| <b>Non-phosphorylated tau concentrations by mass spectrometry</b> |                        |         |                         |         |
| Tau226-230 (ng/ml)                                                | 0.48 (0.41 to 0.54)    | <0.0001 | 0.41 (0.34 to 0.48)     | <0.0001 |
| Tau151-155 (ng/ml)                                                | 0.42 (0.35 to 0.49)    | <0.0001 | 0.36 (0.28 to 0.43)     | <0.0001 |
| Tau195-210 (ng/ml)                                                | 0.42 (0.35 to 0.49)    | <0.0001 | 0.36 (0.28 to 0.43)     | <0.0001 |
| Tau181-190 (ng/ml)                                                | 0.36 (0.29 to 0.43)    | <0.0001 | 0.29 (0.22 to 0.37)     | <0.0001 |
| Tau212-221 (ng/ml)                                                | 0.34 (0.26 to 0.41)    | <0.0001 | 0.26 (0.19 to 0.34)     | <0.0001 |

**Supplemental Table 6. Correlations between CSF biomarkers and amyloid PET Centiloid for amyloid PET positive individuals in the Knight ADRC amyloid PET cohort.** The Spearman correlation and partial Spearman correlation after adjusting for age and sex are shown. CSF measures are shown in order of the absolute value of their correlation with amyloid PET Centiloid, stratified by measure type. All tests were two-sided and were not adjusted for multiple comparisons.

| Measure                                                           | n=  | Spearman $\rho$        | p=      | Partial Spearman $\rho$ | p=      |
|-------------------------------------------------------------------|-----|------------------------|---------|-------------------------|---------|
| <b>CSF Lumipulse measures</b>                                     |     |                        |         |                         |         |
| p-tau181 (pg/ml)                                                  | 263 | 0.44 (0.34 to 0.53)    | <0.0001 | 0.43 (0.32 to 0.52)     | <0.0001 |
| A $\beta$ 42/A $\beta$ 40                                         | 263 | -0.42 (-0.52 to -0.32) | <0.0001 | -0.41 (-0.50 to -0.30)  | <0.0001 |
| A $\beta$ 42 (pg/ml)                                              | 263 | -0.41 (-0.51 to -0.31) | <0.0001 | -0.41 (-0.51 to -0.31)  | <0.0001 |
| Total tau (pg/ml)                                                 | 263 | 0.29 (0.17 to 0.40)    | <0.0001 | 0.28 (0.16 to 0.39)     | <0.0001 |
| A $\beta$ 40 (pg/ml)                                              | 263 | -0.13 (-0.25 to -0.01) | 0.03    | -0.15 (-0.26 to -0.02)  | 0.02    |
| <b>Phosphorylation occupancies by mass spectrometry</b>           |     |                        |         |                         |         |
| pT217/T217 (%)                                                    | 263 | 0.69 (0.62 to 0.75)    | <0.0001 | 0.68 (0.61 to 0.74)     | <0.0001 |
| pT111/T111 (%)                                                    | 263 | 0.57 (0.48 to 0.65)    | <0.0001 | 0.57 (0.48 to 0.64)     | <0.0001 |
| pT181/T181 (%)                                                    | 262 | 0.54 (0.45 to 0.62)    | <0.0001 | 0.54 (0.45 to 0.62)     | <0.0001 |
| pT205/T205 (%)                                                    | 263 | 0.53 (0.44 to 0.61)    | <0.0001 | 0.53 (0.44 to 0.61)     | <0.0001 |
| pS208/S208 (%)                                                    | 260 | 0.49 (0.40 to 0.58)    | <0.0001 | 0.49 (0.39 to 0.58)     | <0.0001 |
| pT231/T231 (%)                                                    | 240 | 0.44 (0.34 to 0.54)    | <0.0001 | 0.44 (0.34 to 0.54)     | <0.0001 |
| pT153/T153 (%)                                                    | 261 | 0.44 (0.34 to 0.53)    | <0.0001 | 0.45 (0.34 to 0.54)     | <0.0001 |
| pT175/T175 (%)                                                    | 257 | -0.14 (-0.25 to -0.01) | 0.03    | -0.17 (-0.28 to -0.04)  | 0.007   |
| pS202/S202 (%)                                                    | 263 | -0.11 (-0.23 to 0.01)  | 0.07    | -0.11 (-0.23 to 0.01)   | 0.07    |
| pS199/S199 (%)                                                    | 263 | 0.05 (-0.07 to 0.17)   | 0.42    | 0.06 (-0.07 to 0.18)    | 0.36    |
| <b>Phosphorylated tau concentrations by mass spectrometry</b>     |     |                        |         |                         |         |
| p-tau205 (pg/ml)                                                  | 263 | 0.55 (0.46 to 0.63)    | <0.0001 | 0.54 (0.45 to 0.62)     | <0.0001 |
| p-tau217 (pg/ml)                                                  | 263 | 0.54 (0.45 to 0.62)    | <0.0001 | 0.53 (0.44 to 0.62)     | <0.0001 |
| p-tau208 (pg/ml)                                                  | 260 | 0.50 (0.41 to 0.59)    | <0.0001 | 0.49 (0.40 to 0.58)     | <0.0001 |
| p-tau231 (pg/ml)                                                  | 239 | 0.44 (0.33 to 0.54)    | <0.0001 | 0.44 (0.33 to 0.54)     | <0.0001 |
| p-tau153 (pg/ml)                                                  | 261 | 0.43 (0.32 to 0.52)    | <0.0001 | 0.42 (0.32 to 0.52)     | <0.0001 |
| p-tau181 (pg/ml)                                                  | 262 | 0.33 (0.22 to 0.44)    | <0.0001 | 0.32 (0.20 to 0.42)     | <0.0001 |
| p-tau202 (pg/ml)                                                  | 263 | 0.26 (0.15 to 0.37)    | <0.0001 | 0.25 (0.13 to 0.36)     | <0.0001 |
| p-tau199 (pg/ml)                                                  | 263 | 0.25 (0.14 to 0.36)    | <0.0001 | 0.25 (0.13 to 0.36)     | <0.0001 |
| p-tau175 (pg/ml)                                                  | 257 | 0.05 (-0.07 to 0.18)   | 0.39    | 0.03 (-0.09 to 0.15)    | 0.63    |
| <b>Non-phosphorylated tau concentrations by mass spectrometry</b> |     |                        |         |                         |         |
| Tau195-210 (ng/ml)                                                | 263 | 0.26 (0.15 to 0.37)    | <0.0001 | 0.25 (0.13 to 0.36)     | <0.0001 |
| Tau151-155 (ng/ml)                                                | 261 | 0.23 (0.11 to 0.34)    | 0.0002  | 0.21 (0.09 to 0.32)     | 0.0006  |
| Tau181-190 (ng/ml)                                                | 263 | 0.19 (0.07 to 0.30)    | 0.002   | 0.18 (0.06 to 0.29)     | 0.004   |
| Tau226-230 (ng/ml)                                                | 259 | 0.19 (0.07 to 0.31)    | 0.0016  | 0.19 (0.07 to 0.31)     | 0.002   |
| Tau212-221 (ng/ml)                                                | 263 | 0.17 (0.05 to 0.29)    | 0.005   | 0.16 (0.04 to 0.27)     | 0.01    |

**Supplemental Table 7. CSF tau measures for the Knight ADRC tau PET cohort.** Continuous values are presented as the median with the interquartile range. The significance of differences by tau PET status were evaluated with Wilcoxon ranked sum tests for continuous variables and Chi-Square or Fisher exact tests for categorical variables. The fold difference is the median biomarker value in the tau PET positive group divided by the median value in the tau PET negative group. All tests were two-sided and were not adjusted for multiple comparisons.

| Characteristic                                                    | Entire cohort (n=371) |                       | Tau PET negative (n=319) |                       | Tau PET positive (n=52) |                     | Fold change | p=      |
|-------------------------------------------------------------------|-----------------------|-----------------------|--------------------------|-----------------------|-------------------------|---------------------|-------------|---------|
| <b>Phosphorylation occupancies by mass spectrometry</b>           |                       |                       |                          |                       |                         |                     |             |         |
| pT111/T111 (%)                                                    | 369                   | 3.30 (2.35-6.51)      | 317                      | 3.01 (2.25-4.45)      | 52                      | 9.73 (8.44-11.4)    | 3.23        | <0.0001 |
| pT153/T153 (%)                                                    | 326                   | 0.0601 (0.0319-0.118) | 274                      | 0.048 (0.0277-0.0803) | 52                      | 0.163 (0.119-0.21)  | 3.40        | <0.0001 |
| pT175/T175 (%)                                                    | 363                   | 0.458 (0.377-0.554)   | 311                      | 0.465 (0.381-0.559)   | 52                      | 0.427 (0.367-0.516) | 0.92        | 0.11    |
| pT181/T181 (%)                                                    | 370                   | 29.6 (27.4-32.4)      | 318                      | 28.9 (27.1-31)        | 52                      | 36.8 (35-40.3)      | 1.27        | <0.0001 |
| pS199/S199 (%)                                                    | 368                   | 0.674 (0.528-0.867)   | 316                      | 0.663 (0.515-0.829)   | 52                      | 0.774 (0.649-0.975) | 1.17        | 0.0007  |
| pS202/S202 (%)                                                    | 371                   | 5.61 (4.68-6.54)      | 319                      | 5.66 (4.86-6.67)      | 52                      | 4.76 (4.22-5.95)    | 0.84        | 0.0002  |
| pT205/T205 (%)                                                    | 371                   | 0.959 (0.786-1.21)    | 319                      | 0.907 (0.763-1.12)    | 52                      | 1.54 (1.37-1.81)    | 1.70        | <0.0001 |
| pS208/S208 (%)                                                    | 332                   | 0.143 (0.0888-0.247)  | 280                      | 0.126 (0.0812-0.185)  | 52                      | 0.301 (0.259-0.361) | 2.39        | <0.0001 |
| pT217/T217 (%)                                                    | 371                   | 3.52 (3.03-7.02)      | 319                      | 3.32 (2.97-4.64)      | 52                      | 12.1 (10.6-13.6)    | 3.64        | <0.0001 |
| pT231/T231 (%)                                                    | 298                   | 8.54 (3.83-21.2)      | 249                      | 6.75 (2.88-12.7)      | 49                      | 27.4 (24.3-33.7)    | 4.06        | <0.0001 |
| <b>Phosphorylated tau concentrations by mass spectrometry</b>     |                       |                       |                          |                       |                         |                     |             |         |
| p-tau153 (pg/ml)                                                  | 326                   | 1.08 (0.537-3.26)     | 274                      | 0.912 (0.482-1.79)    | 52                      | 4.81 (3.89-7.57)    | 5.27        | <0.0001 |
| p-tau175 (pg/ml)                                                  | 363                   | 11.0 (6.96-14.7)      | 311                      | 10.5 (6.5-13.8)       | 52                      | 13.9 (10.9-17.2)    | 1.32        | <0.0001 |
| p-tau181 (pg/ml)                                                  | 370                   | 661 (477-1010)        | 318                      | 631 (463-833)         | 52                      | 1210 (957-1530)     | 1.92        | <0.0001 |
| p-tau199 (pg/ml)                                                  | 368                   | 16.9 (11.5-24)        | 316                      | 15.7 (10.6-21.1)      | 52                      | 27.7 (23.1-39.6)    | 1.76        | <0.0001 |
| p-tau202 (pg/ml)                                                  | 371                   | 138 (111-168)         | 319                      | 131 (109-158)         | 52                      | 185 (144-224)       | 1.41        | <0.0001 |
| p-tau205 (pg/ml)                                                  | 371                   | 22.6 (16.9-34.3)      | 319                      | 21.3 (16.1-27.1)      | 52                      | 59.1 (44.4-74.3)    | 2.77        | <0.0001 |
| p-tau208 (pg/ml)                                                  | 332                   | 3.51 (1.94-7.28)      | 280                      | 2.90 (1.71-4.96)      | 52                      | 11.3 (9.04-15.6)    | 3.90        | <0.0001 |
| p-tau217 (pg/ml)                                                  | 371                   | 59.5 (43.2-143)       | 319                      | 54.5 (39.7-87.9)      | 52                      | 270 (212-385)       | 4.95        | <0.0001 |
| p-tau231 (pg/ml)                                                  | 297                   | 19.6 (7.18-64.7)      | 248                      | 14.1 (5.98-33.1)      | 49                      | 101 (74.7-147)      | 7.16        | <0.0001 |
| <b>Non-phosphorylated tau concentrations by mass spectrometry</b> |                       |                       |                          |                       |                         |                     |             |         |
| Tau151-155 (ng/ml)                                                | 369                   | 1.97 (1.5-2.72)       | 317                      | 1.88 (1.41-2.44)      | 52                      | 3.10 (2.44-3.67)    | 1.65        | <0.0001 |
| Tau181-190 (ng/ml)                                                | 371                   | 2.27 (1.76-3.09)      | 319                      | 2.17 (1.66-2.79)      | 52                      | 3.37 (2.59-3.95)    | 1.55        | <0.0001 |
| Tau195-210 (ng/ml)                                                | 371                   | 2.44 (1.87-3.32)      | 319                      | 2.31 (1.76-2.94)      | 52                      | 3.78 (2.95-4.53)    | 1.64        | <0.0001 |
| Tau212-221 (ng/ml)                                                | 371                   | 1.69 (1.28-2.23)      | 319                      | 1.59 (1.20-2.06)      | 52                      | 2.35 (1.85-2.79)    | 1.48        | <0.0001 |
| Tau226-230 (ng/ml)                                                | 351                   | 0.228 (0.158-0.327)   | 299                      | 0.206 (0.147-0.286)   | 52                      | 0.343 (0.291-0.506) | 1.67        | <0.0001 |

**Supplemental Table 8. CSF tau measures for individuals in the Knight ADRC tau PET cohort with no missing CSF biomarker measures.** Continuous values are presented as the median with the interquartile range. The significance of differences by tau PET status were evaluated with Wilcoxon ranked sum tests for continuous variables and Chi-Square or Fisher exact tests for categorical variables. The fold difference is the median biomarker value in the amyloid PET positive group divided by the median value in the amyloid PET negative group. All tests were two-sided and were not adjusted for multiple comparisons.

| Characteristic                                          | Entire cohort (n=264) | Tau PET negative (n=215) | Tau PET positive (n=49) | Fold difference | p=      |
|---------------------------------------------------------|-----------------------|--------------------------|-------------------------|-----------------|---------|
| <b>Phosphorylation occupancies by mass spectrometry</b> |                       |                          |                         |                 |         |
| pT111/T111 (%)                                          | 3.8 (2.53-8.13)       | 3.21 (2.4-5.07)          | 9.65 (8.44-11.1)        | 3.01            | <0.0001 |
| pT153/T153 (%)                                          | 0.0626 (0.0338-0.124) | 0.0498 (0.0303-0.0848)   | 0.163 (0.123-0.21)      | 3.27            | <0.0001 |
| pT175/T175 (%)                                          | 0.47 (0.398-0.566)    | 0.491 (0.405-0.572)      | 0.427 (0.367-0.532)     | 0.87            | 0.007   |
| pT181/T181 (%)                                          | 30.2 (28.2-35)        | 29.5 (27.8-31.8)         | 36.8 (35-40.3)          | 1.25            | <0.0001 |
| pS199/S199 (%)                                          | 0.693 (0.554-0.887)   | 0.678 (0.545-0.828)      | 0.774 (0.649-0.976)     | 1.14            | 0.003   |
| pS202/S202 (%)                                          | 5.44 (4.62-6.41)      | 5.57 (4.7-6.62)          | 4.76 (4.22-5.98)        | 0.85            | 0.004   |
| pT205/T205 (%)                                          | 1.01 (0.819-1.3)      | 0.94 (0.787-1.14)        | 1.54 (1.37-1.81)        | 1.64            | <0.0001 |
| pS208/S208 (%)                                          | 0.15 (0.0962-0.269)   | 0.132 (0.0884-0.193)     | 0.301 (0.265-0.373)     | 2.28            | <0.0001 |
| pT217/T217 (%)                                          | 4.03 (3.17-8.93)      | 3.46 (3.06-5.4)          | 12.1 (10.6-13.8)        | 3.50            | <0.0001 |
| pT231/T231 (%)                                          | 9.78 (4.24-23.7)      | 7.66 (3.61-13.6)         | 27.4 (24.3-33.7)        | 3.58            | <0.0001 |
|                                                         |                       |                          |                         |                 |         |
| p-tau153 (pg/ml)                                        | 1.22 (0.602-3.71)     | 0.997 (0.535-2.12)       | 4.81 (3.89-7.67)        | 4.82            | <0.0001 |
| p-tau175 (pg/ml)                                        | 11.9 (8.74-15.9)      | 11.6 (8.39-15)           | 14.0 (11.6-18.1)        | 1.21            | 0.0005  |
| p-tau181 (pg/ml)                                        | 747 (556-1130)        | 676 (521-937)            | 1210 (957-1530)         | 1.79            | <0.0001 |
| p-tau199 (pg/ml)                                        | 19.4 (13.5-26.6)      | 17.3 (12.3-23.0)         | 28.4 (23.8-40.0)        | 1.64            | <0.0001 |
| p-tau202 (pg/ml)                                        | 146 (121-180)         | 142 (114-164)            | 185 (144-227)           | 1.30            | <0.0001 |
| p-tau205 (pg/ml)                                        | 25 (19.8-40.1)        | 22.7 (18.5-30.1)         | 59.1 (44.9-74.4)        | 2.60            | <0.0001 |
| p-tau208 (pg/ml)                                        | 3.73 (2.29-8.59)      | 3.21 (1.94-5.48)         | 11.3 (9.24-15.6)        | 3.52            | <0.0001 |
| p-tau217 (pg/ml)                                        | 78.1 (49.6-188)       | 63.3 (45.8-111)          | 270 (226-401)           | 4.27            | <0.0001 |
| p-tau231 (pg/ml)                                        | 23.2 (8.61-74.5)      | 15.9 (6.86-35.0)         | 101 (74.7-147)          | 6.35            | <0.0001 |
|                                                         |                       |                          |                         |                 |         |
| Tau151-155 (ng/ml)                                      | 2.16 (1.70-3.04)      | 2.05 (1.60-2.67)         | 3.10 (2.46-3.67)        | 1.51            | <0.0001 |
| Tau181-190 (ng/ml)                                      | 2.50 (1.97-3.37)      | 2.29 (1.87-3.08)         | 3.37 (2.74-3.95)        | 1.47            | <0.0001 |
| Tau195-210 (ng/ml)                                      | 2.69 (2.10-3.64)      | 2.46 (1.99-3.22)         | 3.78 (2.96-4.53)        | 1.54            | <0.0001 |
| Tau212-221 (ng/ml)                                      | 1.83 (1.43-2.47)      | 1.73 (1.37-2.24)         | 2.38 (1.90-2.82)        | 1.38            | <0.0001 |
| Tau226-230 (ng/ml)                                      | 0.243 (0.182-0.337)   | 0.228 (0.175-0.306)      | 0.343 (0.291-0.506)     | 1.50            | <0.0001 |

**Supplemental Table 9. Correspondence of CSF measures with the tau PET summary measure in the Knight ADRC tau PET cohort.** The receiver operating characteristic area under the curve of CSF measures with tau PET status is shown with 95% confidence intervals. The cut-off for the CSF measures that best distinguished tau PET status, as well as the positive percent agreement (PPA) and negative percent agreement (NPA) of the cut-off for tau PET status, are shown. CSF measures are listed in order of correspondence with tau PET status, stratified by measure type.

| Analyte                                                           | AUC (95% CI)        | Cut-off | PPA  | NPA  |
|-------------------------------------------------------------------|---------------------|---------|------|------|
| <b>CSF Lumipulse measures</b>                                     |                     |         |      |      |
| p-tau181 (pg/ml)                                                  | 0.92 (0.89 to 0.95) | 51.8    | 0.96 | 0.80 |
| A $\beta$ 42/A $\beta$ 40                                         | 0.92 (0.89 to 0.94) | 0.055   | 0.96 | 0.82 |
| Total tau (pg/ml)                                                 | 0.87 (0.83 to 0.91) | 358     | 0.94 | 0.71 |
| A $\beta$ 42 (pg/ml)                                              | 0.87 (0.83 to 0.91) | 625     | 0.90 | 0.75 |
| A $\beta$ 40 (pg/ml)                                              | 0.51 (0.43 to 0.60) | 11072   | 0.62 | 0.49 |
| <b>Phosphorylation occupancies by mass spectrometry</b>           |                     |         |      |      |
| pT217/T217 (%)                                                    | 0.96 (0.94 to 0.98) | 7.65    | 0.96 | 0.88 |
| pT205/T205 (%)                                                    | 0.94 (0.91 to 0.97) | 1.21    | 0.90 | 0.85 |
| pT111/T111 (%)                                                    | 0.92 (0.89 to 0.95) | 6.15    | 0.96 | 0.83 |
| pT181/T181 (%)                                                    | 0.90 (0.87 to 0.94) | 34.26   | 0.85 | 0.89 |
| pT153/T153 (%)                                                    | 0.90 (0.86 to 0.93) | 0.11    | 0.88 | 0.82 |
| pS208/S208 (%)                                                    | 0.90 (0.87 to 0.94) | 0.21    | 0.96 | 0.80 |
| pT231/T231 (%)                                                    | 0.89 (0.86 to 0.93) | 17      | 0.94 | 0.83 |
| pS202/S202 (%)                                                    | 0.66 (0.59 to 0.74) | 5.02    | 0.58 | 0.71 |
| pS199/S199 (%)                                                    | 0.65 (0.57 to 0.72) | 0.64    | 0.81 | 0.47 |
| pT175/T175 (%)                                                    | 0.57 (0.49 to 0.65) | 0.46    | 0.67 | 0.51 |
| <b>Phosphorylated tau concentrations by mass spectrometry</b>     |                     |         |      |      |
| p-tau205 (pg/ml)                                                  | 0.96 (0.94 to 0.98) | 38.11   | 0.92 | 0.90 |
| p-tau217 (pg/ml)                                                  | 0.95 (0.93 to 0.97) | 149     | 0.94 | 0.87 |
| p-tau208 (pg/ml)                                                  | 0.92 (0.89 to 0.95) | 7.28    | 0.90 | 0.87 |
| p-tau231 (pg/ml)                                                  | 0.91 (0.88 to 0.94) | 53.5    | 0.92 | 0.83 |
| p-tau153 (pg/ml)                                                  | 0.90 (0.87 to 0.93) | 2.53    | 0.88 | 0.83 |
| p-tau181 (pg/ml)                                                  | 0.87 (0.83 to 0.91) | 837     | 0.90 | 0.75 |
| p-tau199 (pg/ml)                                                  | 0.83 (0.78 to 0.89) | 23.0    | 0.77 | 0.80 |
| p-tau202 (pg/ml)                                                  | 0.81 (0.75 to 0.87) | 170     | 0.67 | 0.83 |
| p-tau175 (pg/ml)                                                  | 0.70 (0.62 to 0.77) | 12.4    | 0.69 | 0.68 |
| <b>Non-phosphorylated tau concentrations by mass spectrometry</b> |                     |         |      |      |
| Tau195-210 (ng/ml)                                                | 0.85 (0.80 to 0.89) | 2.75    | 0.88 | 0.70 |
| Tau151-155 (ng/ml)                                                | 0.83 (0.78 to 0.88) | 2.27    | 0.85 | 0.70 |
| Tau181-190 (ng/ml)                                                | 0.81 (0.75 to 0.87) | 2.74    | 0.75 | 0.74 |
| Tau226-230 (ng/ml)                                                | 0.81 (0.76 to 0.86) | 0.29    | 0.79 | 0.76 |
| Tau212-221 (ng/ml)                                                | 0.80 (0.74 to 0.85) | 1.66    | 0.92 | 0.55 |

**Supplemental Table 10. Correspondence of CSF measures with the tau PET summary measure for amyloid PET positive individuals in the Knight ADRC tau PET cohort.** The receiver operating characteristic area under the curve of CSF measures with tau PET status is shown with 95% confidence intervals. The cut-off for the CSF measures that best distinguished tau PET status, as well as the positive percent agreement (PPA) and negative percent agreement (NPA) of the cut-off for tau PET status, are shown. CSF measures are listed in order of correspondence with tau PET status, stratified by measure type.

| Analyte                                                           | AUC (95% CI)        | Cut-off | PPA  | NPA  |
|-------------------------------------------------------------------|---------------------|---------|------|------|
| <b>CSF Lumipulse measures</b>                                     |                     |         |      |      |
| p-tau181 (pg/ml)                                                  | 0.74 (0.66 to 0.83) | 58.9    | 0.86 | 0.53 |
| A $\beta$ 42/A $\beta$ 40                                         | 0.68 (0.59 to 0.77) | 0.0477  | 0.78 | 0.54 |
| Total tau (pg/ml)                                                 | 0.69 (0.60 to 0.78) | 589     | 0.49 | 0.82 |
| A $\beta$ 42 (pg/ml)                                              | 0.68 (0.59 to 0.77) | 430     | 0.41 | 0.86 |
| A $\beta$ 40 (pg/ml)                                              | 0.59 (0.49 to 0.70) | 11889   | 0.61 | 0.64 |
| <b>Phosphorylation occupancies by mass spectrometry</b>           |                     |         |      |      |
| pT205/T205 (%)                                                    | 0.88 (0.82 to 0.94) | 1.37    | 0.76 | 0.86 |
| pT217/T217 (%)                                                    | 0.83 (0.76 to 0.90) | 10.4    | 0.80 | 0.80 |
| pT111/T111 (%)                                                    | 0.70 (0.61 to 0.79) | 8.44    | 0.76 | 0.65 |
| pS208/S208 (%)                                                    | 0.69 (0.59 to 0.78) | 0.25    | 0.82 | 0.53 |
| pT181/T181 (%)                                                    | 0.68 (0.58 to 0.77) | 34.7    | 0.84 | 0.61 |
| pT153/T153 (%)                                                    | 0.67 (0.57 to 0.76) | 0.139   | 0.73 | 0.64 |
| pT231/T231 (%)                                                    | 0.66 (0.55 to 0.75) | 17.0    | 0.94 | 0.43 |
| pS199/S199 (%)                                                    | 0.59 (0.49 to 0.70) | 0.85    | 0.45 | 0.74 |
| pT175/T175 (%)                                                    | 0.58 (0.49 to 0.69) | 0.46    | 0.69 | 0.51 |
| pS202/S202 (%)                                                    | 0.55 (0.45 to 0.65) | 5.00    | 0.59 | 0.61 |
| <b>Phosphorylated tau concentrations by mass spectrometry</b>     |                     |         |      |      |
| p-tau205 (pg/ml)                                                  | 0.87 (0.81 to 0.93) | 41.0    | 0.86 | 0.76 |
| p-tau217 (pg/ml)                                                  | 0.80 (0.72 to 0.88) | 205     | 0.80 | 0.72 |
| p-tau208 (pg/ml)                                                  | 0.75 (0.66 to 0.84) | 8.09    | 0.82 | 0.65 |
| p-tau231 (pg/ml)                                                  | 0.70 (0.61 to 0.80) | 74.7    | 0.77 | 0.61 |
| p-tau181 (pg/ml)                                                  | 0.69 (0.60 to 0.78) | 1142    | 0.65 | 0.69 |
| p-tau202 (pg/ml)                                                  | 0.69 (0.60 to 0.78) | 171     | 0.67 | 0.68 |
| p-tau153 (pg/ml)                                                  | 0.69 (0.60 to 0.78) | 3.71    | 0.78 | 0.63 |
| p-tau199 (pg/ml)                                                  | 0.69 (0.59 to 0.78) | 23.1    | 0.76 | 0.59 |
| p-tau175 (pg/ml)                                                  | 0.55 (0.45 to 0.65) | 12.3    | 0.71 | 0.42 |
| <b>Non-phosphorylated tau concentrations by mass spectrometry</b> |                     |         |      |      |
| Tau195-210 (ng/ml)                                                | 0.69 (0.59 to 0.78) | 2.67    | 0.90 | 0.41 |
| Tau181-190 (ng/ml)                                                | 0.65 (0.55 to 0.75) | 3.22    | 0.59 | 0.65 |
| Tau151-155 (ng/ml)                                                | 0.65 (0.55 to 0.74) | 2.44    | 0.76 | 0.48 |
| Tau226-230 (ng/ml)                                                | 0.65 (0.55 to 0.75) | 0.30    | 0.76 | 0.54 |
| Tau212-221 (ng/ml)                                                | 0.64 (0.55 to 0.74) | 1.66    | 0.92 | 0.31 |

**Supplemental Table 11. Identification of individuals in the Knight ADRC tau PET cohort who are both tau PET positive and amyloid PET positive.** The receiver operating characteristic area under the curve for individuals who are either both tau PET positive and amyloid PET positive, or any other status, is shown with 95% confidence intervals. The cut-off for the CSF measures that best distinguished individuals who were both tau PET positive and amyloid PET positive status, versus individuals in all other categories, as well as the positive percent agreement (PPA) and negative percent agreement (NPA) of the cut-off, are shown. CSF measures are listed in order of the best prediction of individuals who are both tau PET positive and amyloid PET positive, stratified by measure type.

| Analyte                                                           | AUC (95% CI)        | Cut-off | PPA  | NPA  |
|-------------------------------------------------------------------|---------------------|---------|------|------|
| <b>CSF Lumipulse measures</b>                                     |                     |         |      |      |
| p-tau181 (pg/ml)                                                  | 0.92 (0.89 to 0.95) | 51.8    | 0.96 | 0.79 |
| A $\beta$ 42/A $\beta$ 40                                         | 0.91 (0.88 to 0.94) | 0.0549  | 0.96 | 0.82 |
| A $\beta$ 42 (pg/ml)                                              | 0.87 (0.82 to 0.91) | 625     | 0.90 | 0.75 |
| Total tau (pg/ml)                                                 | 0.86 (0.83 to 0.91) | 358     | 0.94 | 0.70 |
| A $\beta$ 40 (pg/ml)                                              | 0.51 (0.43 to 0.60) | 11072   | 0.61 | 0.48 |
| <b>Phosphorylation occupancies by mass spectrometry</b>           |                     |         |      |      |
| pT217/T217 (%)                                                    | 0.96 (0.94 to 0.98) | 7.65    | 0.96 | 0.88 |
| pT205/T205 (%)                                                    | 0.94 (0.91 to 0.97) | 1.21    | 0.90 | 0.84 |
| pT111/T111 (%)                                                    | 0.92 (0.89 to 0.95) | 6.15    | 0.96 | 0.83 |
| pS208/S208 (%)                                                    | 0.90 (0.86 to 0.94) | 0.21    | 0.98 | 0.79 |
| pT181/T181 (%)                                                    | 0.90 (0.86 to 0.94) | 34.3    | 0.84 | 0.89 |
| pT153/T153 (%)                                                    | 0.90 (0.86 to 0.93) | 0.107   | 0.88 | 0.81 |
| pT231/T231 (%)                                                    | 0.89 (0.86 to 0.93) | 17.0    | 0.94 | 0.82 |
| pS202/S202 (%)                                                    | 0.66 (0.59 to 0.74) | 5.00    | 0.59 | 0.72 |
| pS199/S199 (%)                                                    | 0.64 (0.56 to 0.72) | 0.639   | 0.80 | 0.47 |
| pT175/T175 (%)                                                    | 0.57 (0.50 to 0.65) | 0.459   | 0.69 | 0.52 |
| <b>Phosphorylated tau concentrations by mass spectrometry</b>     |                     |         |      |      |
| p-tau205 (pg/ml)                                                  | 0.96 (0.94 to 0.98) | 38.1    | 0.92 | 0.90 |
| p-tau217 (pg/ml)                                                  | 0.95 (0.93 to 0.97) | 149     | 0.94 | 0.87 |
| p-tau208 (pg/ml)                                                  | 0.92 (0.89 to 0.95) | 7.27    | 0.90 | 0.86 |
| p-tau231 (pg/ml)                                                  | 0.91 (0.87 to 0.94) | 53.5    | 0.92 | 0.83 |
| p-tau153 (pg/ml)                                                  | 0.90 (0.86 to 0.93) | 2.53    | 0.88 | 0.83 |
| p-tau181 (pg/ml)                                                  | 0.87 (0.82 to 0.91) | 837     | 0.90 | 0.75 |
| p-tau199 (pg/ml)                                                  | 0.83 (0.77 to 0.89) | 23.0    | 0.76 | 0.79 |
| p-tau202 (pg/ml)                                                  | 0.80 (0.74 to 0.86) | 170     | 0.67 | 0.82 |
| p-tau175 (pg/ml)                                                  | 0.69 (0.62 to 0.76) | 12.38   | 0.69 | 0.68 |
| <b>Non-phosphorylated tau concentrations by mass spectrometry</b> |                     |         |      |      |
| Tau195-210 (ng/ml)                                                | 0.84 (0.80 to 0.89) | 2.75    | 0.88 | 0.69 |
| Tau151-155 (ng/ml)                                                | 0.83 (0.77 to 0.88) | 2.27    | 0.84 | 0.70 |
| Tau226-230 (ng/ml)                                                | 0.81 (0.75 to 0.86) | 0.289   | 0.78 | 0.76 |
| Tau181-190 (ng/ml)                                                | 0.80 (0.75 to 0.86) | 2.74    | 0.75 | 0.73 |
| Tau212-221 (ng/ml)                                                | 0.79 (0.74 to 0.85) | 1.66    | 0.92 | 0.55 |

**Supplemental Table 12. Correlations between CSF biomarkers and the tau PET summary measure in the Knight ADRC tau PET cohort.** The Spearman correlation and partial Spearman correlation after adjusting for age and sex are shown. CSF measures are shown in order of the absolute value of their correlation with the tau PET summary measure, stratified by measure type. All tests were two-sided and were not adjusted for multiple comparisons.

| Measure                                                           | n=  | Spearman $\rho$        | p=      | Partial Spearman $\rho$ | p=      |
|-------------------------------------------------------------------|-----|------------------------|---------|-------------------------|---------|
| <b>CSF Lumipulse measures</b>                                     |     |                        |         |                         |         |
| p-tau181 (pg/ml)                                                  | 371 | 0.45 (0.36 to 0.53)    | <0.0001 | 0.37 (0.28 to 0.46)     | <0.0001 |
| A $\beta$ 42/A $\beta$ 40                                         | 371 | -0.44 (-0.52 to -0.35) | <0.0001 | -0.37 (-0.45 to -0.27)  | <0.0001 |
| Total tau (pg/ml)                                                 | 371 | 0.41 (0.32 to 0.49)    | <0.0001 | 0.34 (0.24 to 0.43)     | <0.0001 |
| A $\beta$ 42 (pg/ml)                                              | 371 | -0.30 (-0.39 to -0.21) | <0.0001 | -0.29 (-0.38 to -0.19)  | <0.0001 |
| A $\beta$ 40 (pg/ml)                                              | 371 | 0.13 (0.02 to 0.22)    | 0.02    | 0.04 (-0.06 to 0.14)    | 0.46    |
| <b>Phosphorylation occupancies by mass spectrometry</b>           |     |                        |         |                         |         |
| pS208/S208 (%)                                                    | 332 | 0.49 (0.40 to 0.57)    | <0.0001 | 0.47 (0.38 to 0.55)     | <0.0001 |
| pT231/T231 (%)                                                    | 298 | 0.49 (0.40 to 0.57)    | <0.0001 | 0.44 (0.34 to 0.53)     | <0.0001 |
| pT153/T153 (%)                                                    | 326 | 0.48 (0.39 to 0.56)    | <0.0001 | 0.42 (0.33 to 0.51)     | <0.0001 |
| pT217/T217 (%)                                                    | 371 | 0.47 (0.39 to 0.55)    | <0.0001 | 0.44 (0.35 to 0.51)     | <0.0001 |
| pT205/T205 (%)                                                    | 371 | 0.47 (0.39 to 0.55)    | <0.0001 | 0.44 (0.36 to 0.52)     | <0.0001 |
| pT111/T111 (%)                                                    | 369 | 0.41 (0.32 to 0.49)    | <0.0001 | 0.39 (0.30 to 0.47)     | <0.0001 |
| pT181/T181 (%)                                                    | 370 | 0.36 (0.26 to 0.44)    | <0.0001 | 0.32 (0.22 to 0.41)     | <0.0001 |
| pS199/S199 (%)                                                    | 368 | 0.17 (0.07 to 0.27)    | 0.0009  | 0.16 (0.06 to 0.26)     | 0.003   |
| pS202/S202 (%)                                                    | 371 | -0.14 (-0.24 to -0.04) | 0.006   | -0.10 (-0.20 to 0.01)   | 0.06    |
| pT175/T175 (%)                                                    | 363 | -0.04 (-0.14 to 0.06)  | 0.46    | -0.05 (-0.16 to 0.05)   | 0.31    |
| <b>Phosphorylated tau concentrations by mass spectrometry</b>     |     |                        |         |                         |         |
| p-tau208 (pg/ml)                                                  | 332 | 0.52 (0.44 to 0.60)    | <0.0001 | 0.48 (0.39 to 0.56)     | <0.0001 |
| p-tau205 (pg/ml)                                                  | 371 | 0.51 (0.43 to 0.58)    | <0.0001 | 0.45 (0.36 to 0.53)     | <0.0001 |
| p-tau231 (pg/ml)                                                  | 297 | 0.50 (0.41 to 0.58)    | <0.0001 | 0.45 (0.36 to 0.54)     | <0.0001 |
| p-tau217 (pg/ml)                                                  | 371 | 0.49 (0.41 to 0.57)    | <0.0001 | 0.43 (0.34 to 0.51)     | <0.0001 |
| p-tau153 (pg/ml)                                                  | 326 | 0.49 (0.40 to 0.56)    | <0.0001 | 0.42 (0.33 to 0.51)     | <0.0001 |
| p-tau181 (pg/ml)                                                  | 370 | 0.39 (0.30 to 0.48)    | <0.0001 | 0.31 (0.21 to 0.40)     | <0.0001 |
| p-tau202 (pg/ml)                                                  | 371 | 0.37 (0.28 to 0.45)    | <0.0001 | 0.28 (0.18 to 0.37)     | <0.0001 |
| p-tau199 (pg/ml)                                                  | 368 | 0.36 (0.27 to 0.45)    | <0.0001 | 0.29 (0.20 to 0.38)     | <0.0001 |
| p-tau175 (pg/ml)                                                  | 363 | 0.25 (0.15 to 0.34)    | <0.0001 | 0.17 (0.07 to 0.27)     | 0.001   |
| <b>Non-phosphorylated tau concentrations by mass spectrometry</b> |     |                        |         |                         |         |
| Tau151-155 (ng/ml)                                                | 369 | 0.48 (0.40 to 0.56)    | <0.0001 | 0.27 (0.17 to 0.36)     | <0.0001 |
| Tau195-210 (ng/ml)                                                | 371 | 0.48 (0.40 to 0.56)    | <0.0001 | 0.28 (0.19 to 0.37)     | <0.0001 |
| Tau181-190 (ng/ml)                                                | 371 | 0.42 (0.34 to 0.50)    | <0.0001 | 0.25 (0.15 to 0.34)     | <0.0001 |
| Tau212-221 (ng/ml)                                                | 371 | 0.42 (0.33 to 0.50)    | <0.0001 | 0.24 (0.14 to 0.33)     | <0.0001 |
| Tau226-230 (ng/ml)                                                | 351 | 0.30 (0.20 to 0.39)    | <0.0001 | 0.24 (0.14 to 0.34)     | <0.0001 |



**Supplemental Table 13. Correlations between CSF biomarkers and the tau PET summary measure for individuals in the Knight ADRC tau PET cohort with no missing CSF biomarker measures (n=264).** The Spearman correlation and partial Spearman correlation after adjusting for age and sex are shown. CSF measures are shown in order of the absolute value of their correlation with the tau PET summary measure, stratified by measure type. All tests were two-sided and were not adjusted for multiple comparisons.

| Measure                                                           | Spearman $\rho$        | p=      | Partial Spearman $\rho$ | p=      |
|-------------------------------------------------------------------|------------------------|---------|-------------------------|---------|
| <b>CSF Lumipulse measures</b>                                     |                        |         |                         |         |
| A $\beta$ 42/A $\beta$ 40                                         | -0.53 (-0.61 to -0.43) | <0.0001 | -0.46 (-0.55 to -0.36)  | <0.0001 |
| p-tau181 (pg/ml)                                                  | 0.52 (0.43 to 0.60)    | <0.0001 | 0.46 (0.36 to 0.55)     | <0.0001 |
| Total tau (pg/ml)                                                 | 0.45 (0.35 to 0.54)    | <0.0001 | 0.39 (0.29 to 0.49)     | <0.0001 |
| A $\beta$ 42 (pg/ml)                                              | -0.42 (-0.51 to -0.31) | <0.0001 | -0.38 (-0.48 to -0.27)  | <0.0001 |
| A $\beta$ 40 (pg/ml)                                              | 0.08 (-0.04 to 0.20)   | 0.19    | 0.03 (-0.09 to 0.15)    | 0.62    |
| <b>Phosphorylation occupancies by mass spectrometry</b>           |                        |         |                         |         |
| pT217/T217 (%)                                                    | 0.59 (0.51 to 0.66)    | <0.0001 | 0.56 (0.47 to 0.64)     | <0.0001 |
| pS208/S208 (%)                                                    | 0.58 (0.50 to 0.66)    | <0.0001 | 0.56 (0.47 to 0.64)     | <0.0001 |
| pT205/T205 (%)                                                    | 0.52 (0.43 to 0.61)    | <0.0001 | 0.51 (0.41 to 0.59)     | <0.0001 |
| pT111/T111 (%)                                                    | 0.51 (0.42 to 0.60)    | <0.0001 | 0.48 (0.38 to 0.57)     | <0.0001 |
| pT231/T231 (%)                                                    | 0.51 (0.42 to 0.59)    | <0.0001 | 0.47 (0.37 to 0.56)     | <0.0001 |
| pT153/T153 (%)                                                    | 0.49 (0.39 to 0.57)    | <0.0001 | 0.45 (0.35 to 0.54)     | <0.0001 |
| pT181/T181 (%)                                                    | 0.42 (0.32 to 0.51)    | <0.0001 | 0.39 (0.29 to 0.49)     | <0.0001 |
| pS202/S202 (%)                                                    | -0.18 (-0.30 to -0.07) | 0.003   | -0.15 (-0.27 to -0.03)  | 0.01    |
| pS199/S199 (%)                                                    | 0.17 (0.05 to 0.29)    | 0.005   | 0.17 (0.05 to 0.29)     | 0.005   |
| pT175/T175 (%)                                                    | -0.13 (-0.24 to -0.01) | 0.04    | -0.10 (-0.22 to 0.02)   | 0.10    |
| <b>Phosphorylated tau concentrations by mass spectrometry</b>     |                        |         |                         |         |
| p-tau208 (pg/ml)                                                  | 0.60 (0.52 to 0.68)    | <0.0001 | 0.57 (0.48 to 0.64)     | <0.0001 |
| p-tau205 (pg/ml)                                                  | 0.59 (0.50 to 0.66)    | <0.0001 | 0.54 (0.45 to 0.62)     | <0.0001 |
| p-tau217 (pg/ml)                                                  | 0.59 (0.50 to 0.66)    | <0.0001 | 0.54 (0.45 to 0.62)     | <0.0001 |
| p-tau231 (pg/ml)                                                  | 0.53 (0.44 to 0.61)    | <0.0001 | 0.48 (0.39 to 0.57)     | <0.0001 |
| p-tau153 (pg/ml)                                                  | 0.50 (0.40 to 0.59)    | <0.0001 | 0.46 (0.35 to 0.55)     | <0.0001 |
| p-tau181 (pg/ml)                                                  | 0.45 (0.34 to 0.54)    | <0.0001 | 0.38 (0.27 to 0.48)     | <0.0001 |
| p-tau199 (pg/ml)                                                  | 0.41 (0.31 to 0.51)    | <0.0001 | 0.37 (0.26 to 0.47)     | <0.0001 |
| p-tau202 (pg/ml)                                                  | 0.38 (0.27 to 0.48)    | <0.0001 | 0.31 (0.19 to 0.41)     | <0.0001 |
| p-tau175 (pg/ml)                                                  | 0.24 (0.13 to 0.35)    | <0.0001 | 0.19 (0.07 to 0.31)     | 0.0016  |
| <b>Non-phosphorylated tau concentrations by mass spectrometry</b> |                        |         |                         |         |
| Tau195-210 (ng/ml)                                                | 0.42 (0.32 to 0.52)    | <0.0001 | 0.35 (0.24 to 0.45)     | <0.0001 |
| Tau151-155 (ng/ml)                                                | 0.40 (0.30 to 0.50)    | <0.0001 | 0.33 (0.22 to 0.44)     | <0.0001 |
| Tau226-230 (ng/ml)                                                | 0.40 (0.29 to 0.50)    | <0.0001 | 0.34 (0.23 to 0.44)     | <0.0001 |
| Tau181-190 (ng/ml)                                                | 0.38 (0.27 to 0.48)    | <0.0001 | 0.31 (0.19 to 0.41)     | <0.0001 |
| Tau212-221 (ng/ml)                                                | 0.37 (0.26 to 0.47)    | <0.0001 | 0.29 (0.18 to 0.40)     | <0.0001 |

**Supplemental Table 14. Correlations between CSF biomarkers and the tau PET summary measure for amyloid PET positive individuals in the Knight ADRC tau PET cohort.** The Spearman correlation and partial Spearman correlation after adjusting for age and sex are shown. CSF measures are shown in order of the absolute value of their correlation with the tau PET summary measure, stratified by measure type. All tests were two-sided and were not adjusted for multiple comparisons.

| Measure                                                           | n=  | Spearman $\rho$        | p=      | Partial Spearman $\rho$ | p=      |
|-------------------------------------------------------------------|-----|------------------------|---------|-------------------------|---------|
| <b>CSF Lumipulse measures</b>                                     |     |                        |         |                         |         |
| A $\beta$ 42 (pg/ml)                                              | 125 | -0.37 (-0.51 to -0.20) | <0.0001 | -0.37 (-0.51 to -0.21)  | <0.0001 |
| p-tau181 (pg/ml)                                                  | 125 | 0.36 (0.20 to 0.51)    | <0.0001 | 0.32 (0.15 to 0.47)     | 0.0003  |
| A $\beta$ 42/A $\beta$ 40                                         | 125 | -0.31 (-0.46 to -0.15) | 0.0003  | -0.28 (-0.43 to -0.11)  | 0.002   |
| Total tau (pg/ml)                                                 | 125 | 0.29 (0.12 to 0.44)    | 0.001   | 0.25 (0.08 to 0.41)     | 0.004   |
| A $\beta$ 40 (pg/ml)                                              | 125 | -0.21 (-0.37 to -0.04) | 0.02    | -0.25 (-0.41 to -0.07)  | 0.005   |
| <b>Phosphorylation occupancies by mass spectrometry</b>           |     |                        |         |                         |         |
| pT205/T205 (%)                                                    | 125 | 0.72 (0.63 to 0.80)    | <0.0001 | 0.72 (0.62 to 0.80)     | <0.0001 |
| pT217/T217 (%)                                                    | 125 | 0.55 (0.42 to 0.67)    | <0.0001 | 0.54 (0.41 to 0.66)     | <0.0001 |
| pS208/S208 (%)                                                    | 123 | 0.35 (0.18 to 0.49)    | <0.0001 | 0.33 (0.17 to 0.48)     | 0.0001  |
| pT111/T111 (%)                                                    | 125 | 0.30 (0.13 to 0.45)    | 0.0006  | 0.27 (0.10 to 0.43)     | 0.002   |
| pT181/T181 (%)                                                    | 125 | 0.28 (0.11 to 0.44)    | 0.001   | 0.26 (0.08 to 0.41)     | 0.004   |
| pT153/T153 (%)                                                    | 124 | 0.28 (0.11 to 0.43)    | 0.002   | 0.26 (0.09 to 0.42)     | 0.004   |
| pT231/T231 (%)                                                    | 115 | 0.25 (0.07 to 0.41)    | 0.007   | 0.23 (0.04 to 0.40)     | 0.01    |
| pS199/S199 (%)                                                    | 125 | 0.19 (0.02 to 0.36)    | 0.03    | 0.19 (0.01 to 0.35)     | 0.04    |
| pT175/T175 (%)                                                    | 123 | -0.09 (-0.27 to 0.09)  | 0.30    | -0.13 (-0.30 to 0.05)   | 0.15    |
| pS202/S202 (%)                                                    | 125 | -0.04 (-0.21 to 0.14)  | 0.65    | -0.03 (-0.21 to 0.15)   | 0.75    |
| <b>Phosphorylated tau concentrations by mass spectrometry</b>     |     |                        |         |                         |         |
| p-tau205 (pg/ml)                                                  | 125 | 0.65 (0.54 to 0.74)    | <0.0001 | 0.63 (0.51 to 0.73)     | <0.0001 |
| p-tau217 (pg/ml)                                                  | 125 | 0.48 (0.33 to 0.60)    | <0.0001 | 0.45 (0.29 to 0.58)     | <0.0001 |
| p-tau208 (pg/ml)                                                  | 123 | 0.41 (0.25 to 0.55)    | <0.0001 | 0.38 (0.21 to 0.52)     | <0.0001 |
| p-tau231 (pg/ml)                                                  | 114 | 0.33 (0.16 to 0.49)    | 0.0003  | 0.31 (0.13 to 0.47)     | 0.0009  |
| p-tau153 (pg/ml)                                                  | 124 | 0.31 (0.14 to 0.46)    | 0.0004  | 0.28 (0.10 to 0.43)     | 0.002   |
| p-tau202 (pg/ml)                                                  | 125 | 0.31 (0.14 to 0.46)    | 0.0003  | 0.26 (0.09 to 0.42)     | 0.003   |
| p-tau199 (pg/ml)                                                  | 125 | 0.30 (0.13 to 0.45)    | 0.0006  | 0.26 (0.09 to 0.42)     | 0.003   |
| p-tau181 (pg/ml)                                                  | 125 | 0.28 (0.11 to 0.44)    | 0.001   | 0.23 (0.06 to 0.39)     | 0.009   |
| p-tau175 (pg/ml)                                                  | 123 | 0.10 (-0.08 to 0.27)   | 0.28    | 0.05 (-0.13 to 0.22)    | 0.61    |
| <b>Non-phosphorylated tau concentrations by mass spectrometry</b> |     |                        |         |                         |         |
| Tau195-210 (ng/ml)                                                | 125 | 0.27 (0.10 to 0.43)    | 0.002   | 0.22 (0.05 to 0.38)     | 0.01    |
| Tau181-190 (ng/ml)                                                | 125 | 0.22 (0.04 to 0.38)    | 0.01    | 0.16 (-0.02 to 0.33)    | 0.07    |
| Tau226-230 (ng/ml)                                                | 122 | 0.20 (0.02 to 0.37)    | 0.03    | 0.18 (0.00 to 0.35)     | 0.05    |
| Tau151-155 (ng/ml)                                                | 124 | 0.20 (0.02 to 0.36)    | 0.03    | 0.14 (-0.03 to 0.31)    | 0.11    |
| Tau212-221 (ng/ml)                                                | 125 | 0.20 (0.02 to 0.36)    | 0.03    | 0.14 (-0.03 to 0.31)    | 0.11    |

**Supplemental Table 15. Correlations between CSF pT205/T205 and regional tau PET for amyloid PET positive individuals in the Knight ADRC tau PET cohort.** The partial Spearman correlation after adjusting for age and sex are shown. All tests were two-sided and the significance of correlations was adjusted for comparisons with multiple regions using the Benjamini-Hochberg procedure.

| Region of interest                    | Freesurfer label | Group       | Partial Spearman $\rho$ | Adjusted p-value |
|---------------------------------------|------------------|-------------|-------------------------|------------------|
| inferior temporal gyrus               | INFRTMP          | Temporal    | 0.68 (0.59 to 0.75)     | <0.0001          |
| fusiform gyrus                        | FUSIFORM         | Temporal    | 0.65 (0.56 to 0.73)     | <0.0001          |
| amygdala                              | AMYGDALA         | Subcortical | 0.64 (0.55 to 0.71)     | <0.0001          |
| parahippocampal gyrus                 | PARAHPCMPL       | Temporal    | 0.62 (0.52 to 0.70)     | <0.0001          |
| entorhinal                            | ENTORHINAL       | Temporal    | 0.61 (0.51 to 0.69)     | <0.0001          |
| middle temporal gyrus                 | MIDTMP           | Temporal    | 0.61 (0.52 to 0.70)     | <0.0001          |
| inferior parietal cortex              | INFRPRTL         | Parietal    | 0.60 (0.50 to 0.68)     | <0.0001          |
| banks of the superior temporal sulcus | SSTSBANK         | Temporal    | 0.53 (0.43 to 0.63)     | <0.0001          |
| supramarginal gyrus                   | SUPRAMRGNL       | Parietal    | 0.52 (0.41 to 0.61)     | <0.0001          |
| superior temporal cortex              | SUPERTMP         | Temporal    | 0.50 (0.38 to 0.60)     | <0.0001          |
| isthmus of the cingulate gyrus        | ISTHMUSCNG       | Parietal    | 0.49 (0.38 to 0.59)     | <0.0001          |
| temporal pole                         | TMPPOLE          | Temporal    | 0.49 (0.37 to 0.59)     | <0.0001          |
| precuneus                             | PRECUNEUS        | Parietal    | 0.47 (0.35 to 0.57)     | <0.0001          |
| hippocampus                           | HIPPOCAMPUS      | Subcortical | 0.47 (0.36 to 0.57)     | <0.0001          |
| caudal middle frontal gyrus           | CAUDMIDFRN       | Frontal     | 0.44 (0.32 to 0.55)     | <0.0001          |
| superior parietal cortex              | SUPERPRTL        | Parietal    | 0.44 (0.32 to 0.54)     | <0.0001          |
| lateral occipital cortex              | LATOCC           | Occipital   | 0.37 (0.25 to 0.49)     | 0.0001           |
| postcentral gyrus                     | POSTCNTRL        | Parietal    | 0.36 (0.23 to 0.48)     | 0.0001           |
| insula                                | INSULA           | Insula      | 0.35 (0.22 to 0.47)     | 0.0001           |
| pars orbitalis                        | PARSORBLS        | Frontal     | 0.33 (0.20 to 0.45)     | 0.0004           |
| lateral orbitofrontal cortex          | LATORBFRN        | Frontal     | 0.32 (0.18 to 0.44)     | 0.0007           |
| precentral gyrus                      | PRECNTRL         | Frontal     | 0.31 (0.18 to 0.43)     | 0.0008           |
| superior frontal cortex               | SUPERFRN         | Frontal     | 0.31 (0.17 to 0.43)     | 0.001            |
| rostral middle frontal cortex         | ROSMIDFRN        | Frontal     | 0.27 (0.13 to 0.39)     | 0.005            |
| putamen                               | PUTAMEN          | Subcortical | 0.27 (0.13 to 0.39)     | 0.005            |
| pars opercularis                      | PARAOPRCLRS      | Frontal     | 0.26 (0.13 to 0.39)     | 0.005            |
| pars triangularis                     | PARSTRNGLRS      | Frontal     | 0.25 (0.11 to 0.37)     | 0.009            |
| cuneus                                | CUNEUS           | Occipital   | 0.22 (0.08 to 0.35)     | 0.02             |
| lingual gyrus                         | LINGUAL          | Occipital   | 0.19 (0.05 to 0.32)     | 0.05             |
| medial orbitalfrontal cortex          | MEDORBFRN        | Frontal     | 0.19 (0.05 to 0.32)     | 0.05             |
| posterior cingulate gyrus             | POSTCNG          | Parietal    | 0.19 (0.05 to 0.32)     | 0.05             |
| caudate                               | CAUD             | Subcortical | 0.18 (0.04 to 0.31)     | 0.06             |
| thalamus                              | THALAMUS         | Subcortical | 0.18 (0.04 to 0.31)     | 0.06             |
| pallidum                              | PALLIDUM         | Subcortical | 0.17 (0.03 to 0.31)     | 0.07             |
| ventral diencephalon                  | VENTRALDC        | Subcortical | 0.09 (-0.05 to 0.23)    | 0.38             |
| transverse temporal gyrus             | TRANSTMP         | Temporal    | -0.07 (-0.21 to 0.07)   | 0.51             |
| paracentral gyrus                     | PARACNTRL        | Frontal     | 0.06 (-0.08 to 0.20)    | 0.55             |
| rostral anterior cingulate            | ROSANTCNG        | Frontal     | 0.04 (-0.10 to 0.18)    | 0.69             |
| frontal pole                          | FRNPOLE          | Frontal     | 0.01 (-0.13 to 0.15)    | 0.92             |
| caudal anterior cingulate gyrus       | CAUDANTCNG       | Frontal     | 0.00 (-0.14 to 0.14)    | 0.98             |
| pericalcarine cortex                  | PERICLCRN        | Occipital   | 0.00 (-0.14 to 0.14)    | 1.00             |

**Supplemental Table 16. Correlations between CSF pT217/T217 and regional tau PET for amyloid PET positive individuals in the Knight ADRC tau PET cohort.** The partial Spearman correlation after adjusting for age and sex are shown. All tests were two-sided and the significance of correlations was adjusted for comparisons with multiple regions using the Benjamini-Hochberg procedure.

| Region of interest                    | Freesurfer label | Group       | Partial Spearman $\rho$ | Adjusted p-value |
|---------------------------------------|------------------|-------------|-------------------------|------------------|
| inferior temporal gyrus               | INFRTMP          | Temporal    | 0.55 (0.44 to 0.64)     | <0.0001          |
| parahippocampal gyrus                 | PARAHPCMPL       | Temporal    | 0.54 (0.43 to 0.63)     | <0.0001          |
| middle temporal gyrus                 | MIDTMP           | Temporal    | 0.53 (0.42 to 0.62)     | <0.0001          |
| fusiform gyrus                        | FUSIFORM         | Temporal    | 0.50 (0.39 to 0.60)     | <0.0001          |
| amygdala                              | AMYGDALA         | Subcortical | 0.49 (0.38 to 0.59)     | <0.0001          |
| isthmus of the cingulate gyrus        | ISTHMUSCNG       | Parietal    | 0.49 (0.37 to 0.59)     | <0.0001          |
| inferior parietal cortex              | INFRPRTL         | Parietal    | 0.48 (0.37 to 0.58)     | <0.0001          |
| entorhinal                            | ENTORHINAL       | Temporal    | 0.48 (0.36 to 0.58)     | <0.0001          |
| banks of the superior temporal sulcus | SSTSBANK         | Temporal    | 0.45 (0.33 to 0.55)     | <0.0001          |
| supramarginal gyrus                   | SUPRAMRGNL       | Parietal    | 0.43 (0.30 to 0.53)     | <0.0001          |
| superior temporal cortex              | SUPERTMP         | Temporal    | 0.42 (0.30 to 0.53)     | <0.0001          |
| caudal middle frontal gyrus           | CAUDMIDFRN       | Frontal     | 0.38 (0.25 to 0.49)     | 0.0001           |
| precuneus                             | PRECUNEUS        | Parietal    | 0.37 (0.24 to 0.49)     | 0.0001           |
| temporal pole                         | TMPPOLE          | Temporal    | 0.33 (0.20 to 0.45)     | 0.0005           |
| postcentral gyrus                     | POSTCNTRL        | Parietal    | 0.31 (0.18 to 0.43)     | 0.001            |
| hippocampus                           | HIPPOCAMPUS      | Subcortical | 0.30 (0.17 to 0.43)     | 0.002            |
| superior parietal cortex              | SUPERPRTL        | Parietal    | 0.30 (0.16 to 0.42)     | 0.002            |
| lateral occipital cortex              | LATOCC           | Occipital   | 0.27 (0.13 to 0.39)     | 0.006            |
| insula                                | INSULA           | Insula      | 0.27 (0.13 to 0.39)     | 0.006            |
| rostral middle frontal cortex         | ROSMIDFRN        | Frontal     | 0.25 (0.11 to 0.37)     | 0.01             |
| lateral orbitofrontal cortex          | LATORBFRN        | Frontal     | 0.23 (0.09 to 0.36)     | 0.02             |
| superior frontal cortex               | SUPERFRN         | Frontal     | 0.21 (0.07 to 0.34)     | 0.03             |
| pars opercularis                      | PARAOPRCLRS      | Frontal     | 0.19 (0.05 to 0.32)     | 0.06             |
| precentral gyrus                      | PRECNTRL         | Frontal     | 0.17 (0.03 to 0.30)     | 0.10             |
| medial orbitofrontal cortex           | MEDORBFRN        | Frontal     | 0.17 (0.03 to 0.30)     | 0.10             |
| pars triangularis                     | PARSTRNGLRS      | Frontal     | 0.16 (0.03 to 0.30)     | 0.10             |
| pars orbitalis                        | PARSORBLS        | Frontal     | 0.16 (0.02 to 0.30)     | 0.10             |
| cuneus                                | CUNEUS           | Occipital   | 0.16 (0.02 to 0.29)     | 0.11             |
| pericalcarine cortex                  | PERICLCRN        | Occipital   | -0.15 (-0.28 to -0.01)  | 0.14             |
| ventral diencephalon                  | VENTRALDC        | Subcortical | -0.11 (-0.25 to 0.03)   | 0.28             |
| thalamus                              | THALAMUS         | Subcortical | -0.11 (-0.24 to 0.03)   | 0.32             |
| paracentral gyrus                     | PARACNTRL        | Frontal     | -0.07 (-0.21 to 0.07)   | 0.55             |
| lingual gyrus                         | LINGUAL          | Occipital   | 0.06 (-0.08 to 0.20)    | 0.62             |
| rostral anterior cingulate            | ROSANTCNG        | Frontal     | 0.06 (-0.09 to 0.19)    | 0.63             |
| caudal anterior cingulate gyrus       | CAUDANTCNG       | Frontal     | 0.05 (-0.09 to 0.19)    | 0.63             |
| posterior cingulate gyrus             | POSTCNG          | Parietal    | 0.05 (-0.09 to 0.19)    | 0.63             |
| transverse temporal gyrus             | TRANSTMP         | Temporal    | -0.04 (-0.18 to 0.10)   | 0.71             |
| pallidum                              | PALLIDUM         | Subcortical | -0.02 (-0.16 to 0.12)   | 0.86             |
| frontal pole                          | FRNPOLE          | Frontal     | 0.02 (-0.12 to 0.16)    | 0.86             |
| caudate                               | CAUD             | Subcortical | 0.02 (-0.12 to 0.16)    | 0.86             |
| putamen                               | PUTAMEN          | Subcortical | 0.00 (-0.14 to 0.14)    | 0.99             |

**Supplemental Table 17. Correlations between CSF pT181/T181 and regional tau PET for amyloid PET positive individuals in the Knight ADRC tau PET cohort.** The partial Spearman correlation after adjusting for age and sex are shown. All tests were two-sided and the significance of correlations was adjusted for comparisons with multiple regions using the Benjamini-Hochberg procedure.

| Region of interest                    | Freesurfer label | Group       | Partial Spearman $\rho$ | Adjusted p-value |
|---------------------------------------|------------------|-------------|-------------------------|------------------|
| parahippocampal gyrus                 | PARAHPCMPL       | Temporal    | 0.31 (0.18 to 0.43)     | 0.02             |
| isthmus of the cingulate gyrus        | ISTHMUSCNG       | Parietal    | 0.29 (0.16 to 0.42)     | 0.02             |
| inferior temporal gyrus               | INFRTMP          | Temporal    | 0.27 (0.14 to 0.40)     | 0.03             |
| entorhinal                            | ENTORHINAL       | Temporal    | 0.27 (0.13 to 0.39)     | 0.03             |
| fusiform gyrus                        | FUSIFORM         | Temporal    | 0.25 (0.11 to 0.38)     | 0.04             |
| amygdala                              | AMYGDALA         | Subcortical | 0.23 (0.09 to 0.36)     | 0.07             |
| middle temporal gyrus                 | MIDTMP           | Temporal    | 0.22 (0.08 to 0.35)     | 0.09             |
| banks of the superior temporal sulcus | SSTSBANK         | Temporal    | 0.21 (0.08 to 0.34)     | 0.09             |
| inferior parietal cortex              | INFRPRTL         | Parietal    | 0.19 (0.05 to 0.32)     | 0.16             |
| superior temporal cortex              | SUPERTMP         | Temporal    | 0.18 (0.04 to 0.31)     | 0.20             |
| caudal middle frontal gyrus           | CAUDMIDFRN       | Frontal     | 0.17 (0.03 to 0.31)     | 0.20             |
| ventral diencephalon                  | VENTRALDC        | Subcortical | -0.17 (-0.30 to -0.03)  | 0.20             |
| pericalcarine cortex                  | PERICLCRN        | Occipital   | -0.17 (-0.30 to -0.03)  | 0.20             |
| supramarginal gyrus                   | SUPRAMRGNL       | Parietal    | 0.16 (0.02 to 0.29)     | 0.23             |
| precuneus                             | PRECUNEUS        | Parietal    | 0.15 (0.01 to 0.28)     | 0.30             |
| temporal pole                         | TMPOLE           | Temporal    | 0.13 (-0.01 to 0.27)    | 0.37             |
| hippocampus                           | HIPPOCAMPUS      | Subcortical | 0.12 (-0.02 to 0.25)    | 0.46             |
| paracentral gyrus                     | PARACNTRL        | Frontal     | -0.09 (-0.23 to 0.05)   | 0.68             |
| postcentral gyrus                     | POSTCNTRL        | Parietal    | 0.09 (-0.05 to 0.23)    | 0.68             |
| pallidum                              | PALLIDUM         | Subcortical | -0.09 (-0.23 to 0.05)   | 0.68             |
| lateral occipital cortex              | LATOCC           | Occipital   | 0.08 (-0.06 to 0.22)    | 0.68             |
| thalamus                              | THALAMUS         | Subcortical | -0.08 (-0.22 to 0.06)   | 0.68             |
| putamen                               | PUTAMEN          | Subcortical | -0.08 (-0.22 to 0.06)   | 0.68             |
| rostral middle frontal cortex         | ROSMIDFRN        | Frontal     | 0.07 (-0.07 to 0.20)    | 0.79             |
| insula                                | INSULA           | Insula      | 0.06 (-0.08 to 0.20)    | 0.81             |
| lingual gyrus                         | LINGUAL          | Occipital   | -0.05 (-0.18 to 0.10)   | 0.90             |
| superior frontal cortex               | SUPERFRN         | Frontal     | 0.04 (-0.10 to 0.18)    | 0.90             |
| cuneus                                | CUNEUS           | Occipital   | -0.04 (-0.18 to 0.10)   | 0.90             |
| pars opercularis                      | PARAOPRCLRS      | Frontal     | 0.04 (-0.10 to 0.18)    | 0.90             |
| pars orbitalis                        | PARSORBLS        | Frontal     | 0.04 (-0.10 to 0.18)    | 0.90             |
| transverse temporal gyrus             | TRANSTMP         | Temporal    | -0.04 (-0.18 to 0.10)   | 0.90             |
| lateral orbitofrontal cortex          | LATORBFRN        | Frontal     | 0.04 (-0.11 to 0.17)    | 0.90             |
| pars triangularis                     | PARSTRNGLRS      | Frontal     | 0.03 (-0.11 to 0.17)    | 0.91             |
| rostral anterior cingulate            | ROSANTCNG        | Frontal     | 0.03 (-0.11 to 0.17)    | 0.91             |
| frontal pole                          | FRNPOLE          | Frontal     | -0.02 (-0.16 to 0.12)   | 0.91             |
| superior parietal cortex              | SUPERPRTL        | Parietal    | 0.02 (-0.12 to 0.16)    | 0.91             |
| posterior cingulate gyrus             | POSTCNG          | Parietal    | 0.02 (-0.12 to 0.16)    | 0.91             |
| caudal anterior cingulate gyrus       | CAUDANTCNG       | Frontal     | -0.01 (-0.15 to 0.13)   | 0.96             |
| caudate                               | CAUD             | Subcortical | -0.01 (-0.15 to 0.13)   | 0.98             |
| precentral gyrus                      | PRECNTRL         | Frontal     | 0.00 (-0.14 to 0.14)    | 1.00             |
| medial orbitalfrontal cortex          | MEDORBFRN        | Frontal     | 0.00 (-0.14 to 0.14)    | 1.00             |

**Supplemental Table 18. Correlations between CSF pT231/T231 and regional tau PET for amyloid PET positive individuals in the Knight ADRC tau PET cohort.** The partial Spearman correlation after adjusting for age and sex are shown. All tests were two-sided and the significance of correlations was adjusted for comparisons with multiple regions using the Benjamini-Hochberg procedure.

| Region of interest                    | Freesurfer label | Group       | Partial Spearman $\rho$ | Adjusted p-value |
|---------------------------------------|------------------|-------------|-------------------------|------------------|
| inferior temporal gyrus               | INFRTMP          | Temporal    | 0.31 (0.17 to 0.44)     | 0.03             |
| fusiform gyrus                        | FUSIFORM         | Temporal    | 0.27 (0.13 to 0.40)     | 0.08             |
| banks of the superior temporal sulcus | SSTSBANK         | Temporal    | 0.25 (0.11 to 0.39)     | 0.08             |
| inferior parietal cortex              | INFRPRTL         | Parietal    | 0.25 (0.10 to 0.38)     | 0.08             |
| isthmus of the cingulate gyrus        | ISTHMUSCNG       | Parietal    | 0.24 (0.10 to 0.37)     | 0.08             |
| parahippocampal gyrus                 | PARAHPCMPL       | Temporal    | 0.24 (0.09 to 0.37)     | 0.08             |
| middle temporal gyrus                 | MIDTMP           | Temporal    | 0.23 (0.09 to 0.36)     | 0.09             |
| supramarginal gyrus                   | SUPRAMRGNL       | Parietal    | 0.21 (0.06 to 0.34)     | 0.15             |
| superior temporal cortex              | SUPERTMP         | Temporal    | 0.20 (0.05 to 0.34)     | 0.16             |
| precuneus                             | PRECUNEUS        | Parietal    | 0.19 (0.05 to 0.33)     | 0.16             |
| entorhinal                            | ENTORHINAL       | Temporal    | 0.18 (0.03 to 0.32)     | 0.22             |
| amygdala                              | AMYGDALA         | Subcortical | 0.17 (0.02 to 0.31)     | 0.25             |
| pericalcarine cortex                  | PERICLCRN        | Occipital   | -0.17 (-0.31 to -0.02)  | 0.25             |
| lateral occipital cortex              | LATOCC           | Occipital   | 0.16 (0.01 to 0.30)     | 0.28             |
| caudal middle frontal gyrus           | CAUDMIDFRN       | Frontal     | 0.14 (0.00 to 0.28)     | 0.35             |
| insula                                | INSULA           | Insula      | 0.14 (-0.01 to 0.28)    | 0.36             |
| rostral middle frontal cortex         | ROSMIDFRN        | Frontal     | 0.14 (-0.01 to 0.28)    | 0.36             |
| pars opercularis                      | PARAOPRCLRS      | Frontal     | 0.13 (-0.02 to 0.27)    | 0.40             |
| postcentral gyrus                     | POSTCNTRL        | Parietal    | 0.12 (-0.02 to 0.26)    | 0.42             |
| superior parietal cortex              | SUPERPRTL        | Parietal    | 0.12 (-0.03 to 0.26)    | 0.42             |
| paracentral gyrus                     | PARACNTRL        | Frontal     | -0.11 (-0.26 to 0.03)   | 0.45             |
| lateral orbitofrontal cortex          | LATORBFRN        | Frontal     | 0.10 (-0.05 to 0.24)    | 0.53             |
| medial orbital frontal cortex         | MEDORBFRN        | Frontal     | 0.10 (-0.05 to 0.24)    | 0.53             |
| thalamus                              | THALAMUS         | Subcortical | -0.09 (-0.23 to 0.06)   | 0.61             |
| pars orbitalis                        | PARSORBLS        | Frontal     | 0.08 (-0.07 to 0.23)    | 0.62             |
| transverse temporal gyrus             | TRANSTMP         | Temporal    | 0.08 (-0.07 to 0.23)    | 0.62             |
| putamen                               | PUTAMEN          | Subcortical | -0.07 (-0.21 to 0.08)   | 0.73             |
| cuneus                                | CUNEUS           | Occipital   | 0.06 (-0.08 to 0.21)    | 0.74             |
| temporal pole                         | TMPPOLE          | Temporal    | 0.06 (-0.09 to 0.20)    | 0.75             |
| hippocampus                           | HIPPOCAMPUS      | Subcortical | 0.06 (-0.09 to 0.20)    | 0.74             |
| frontal pole                          | FRNPOLE          | Frontal     | 0.05 (-0.09 to 0.20)    | 0.75             |
| pars triangularis                     | PARSTRNGLRS      | Frontal     | 0.05 (-0.10 to 0.20)    | 0.76             |
| rostral anterior cingulate            | ROSANTCNG        | Frontal     | 0.04 (-0.11 to 0.18)    | 0.83             |
| caudate                               | CAUD             | Subcortical | 0.04 (-0.11 to 0.18)    | 0.83             |
| caudal anterior cingulate gyrus       | CAUDANTCNG       | Frontal     | 0.03 (-0.12 to 0.18)    | 0.86             |
| superior frontal cortex               | SUPERFRN         | Frontal     | 0.03 (-0.12 to 0.17)    | 0.86             |
| posterior cingulate gyrus             | POSTCNG          | Parietal    | -0.03 (-0.17 to 0.12)   | 0.86             |
| precentral gyrus                      | PRECNTRL         | Frontal     | 0.02 (-0.13 to 0.17)    | 0.86             |
| pallidum                              | PALLIDUM         | Subcortical | 0.02 (-0.13 to 0.16)    | 0.89             |
| ventral diencephalon                  | VENTRALDC        | Subcortical | -0.02 (-0.17 to 0.13)   | 0.86             |
| lingual gyrus                         | LINGUAL          | Occipital   | 0.00 (-0.15 to 0.15)    | 1.00             |

**Supplemental Table 19. Correlations between CSF pT205/T205 and regional brain volumes for amyloid PET positive individuals in the Knight ADRC amyloid PET cohort.** The partial Spearman correlation after adjusting for age and sex are shown. All tests were two-sided and the significance of correlations was adjusted for comparisons with multiple regions using the Benjamini-Hochberg procedure.

| Region of interest                    | Freesurfer label | Group       | Partial Spearman $\rho$ | Adjusted p-value |
|---------------------------------------|------------------|-------------|-------------------------|------------------|
| hippocampus                           | HIPPOCAMPUS      | Subcortical | -0.50 (-0.57 to -0.43)  | <0.0001          |
| amygdala                              | AMYGDALA         | Subcortical | -0.45 (-0.53 to -0.37)  | <0.0001          |
| temporal pole                         | TMPPOLE          | Temporal    | -0.40 (-0.47 to -0.31)  | <0.0001          |
| middle temporal gyrus                 | MIDTMP           | Temporal    | -0.39 (-0.47 to -0.30)  | <0.0001          |
| fusiform gyrus                        | FUSIFORM         | Temporal    | -0.38 (-0.45 to -0.29)  | <0.0001          |
| entorhinal                            | ENTORHINAL       | Temporal    | -0.37 (-0.45 to -0.28)  | <0.0001          |
| inferior temporal gyrus               | INFRTMP          | Temporal    | -0.35 (-0.43 to -0.26)  | <0.0001          |
| parahippocampal gyrus                 | PARAHPCMPL       | Temporal    | -0.33 (-0.41 to -0.24)  | <0.0001          |
| supramarginal gyrus                   | SUPRAMRGNL       | Parietal    | -0.32 (-0.40 to -0.23)  | <0.0001          |
| inferior parietal cortex              | INFRPRTL         | Parietal    | -0.31 (-0.39 to -0.22)  | <0.0001          |
| precuneus                             | PRECUNEUS        | Parietal    | -0.28 (-0.37 to -0.19)  | <0.0001          |
| lateral orbitofrontal cortex          | LATORBFRN        | Frontal     | -0.27 (-0.36 to -0.18)  | <0.0001          |
| isthmus of the cingulate gyrus        | ISTHMUSCNG       | Parietal    | -0.24 (-0.33 to -0.15)  | 0.0003           |
| insula                                | INSULA           | Insula      | -0.24 (-0.33 to -0.14)  | 0.0003           |
| lingual gyrus                         | LINGUAL          | Occipital   | -0.23 (-0.32 to -0.14)  | 0.0005           |
| rostral middle frontal cortex         | ROSMIDFRN        | Frontal     | -0.23 (-0.32 to -0.14)  | 0.0005           |
| posterior cingulate gyrus             | POSTCNG          | Parietal    | -0.22 (-0.31 to -0.13)  | 0.0007           |
| pars orbitalis                        | PARSORBLS        | Frontal     | -0.22 (-0.31 to -0.12)  | 0.0009           |
| superior parietal cortex              | SUPERPRTL        | Parietal    | -0.21 (-0.30 to -0.12)  | 0.001            |
| rostral anterior cingulate            | ROSANTCNG        | Frontal     | -0.21 (-0.30 to -0.12)  | 0.001            |
| banks of the superior temporal sulcus | SSTSBANK         | Temporal    | -0.21 (-0.30 to -0.12)  | 0.001            |
| superior temporal cortex              | SUPERTMP         | Temporal    | -0.20 (-0.29 to -0.11)  | 0.002            |
| caudal middle frontal gyrus           | CAUDMIDFRN       | Frontal     | -0.20 (-0.29 to -0.11)  | 0.002            |
| putamen                               | PUTAMEN          | Subcortical | -0.19 (-0.28 to -0.10)  | 0.004            |
| lateral occipital cortex              | LATOCC           | Occipital   | -0.17 (-0.26 to -0.08)  | 0.008            |
| pars opercularis                      | PARAOPRCLRS      | Frontal     | -0.16 (-0.26 to -0.07)  | 0.01             |
| superior frontal cortex               | SUPERFRN         | Frontal     | -0.16 (-0.25 to -0.06)  | 0.02             |
| thalamus                              | THALAMUS         | Subcortical | -0.15 (-0.25 to -0.06)  | 0.02             |
| postcentral gyrus                     | POSTCNTRL        | Parietal    | -0.15 (-0.24 to -0.05)  | 0.02             |
| pars triangularis                     | PARSTRNGLRS      | Frontal     | -0.15 (-0.24 to -0.05)  | 0.02             |
| caudal anterior cingulate gyrus       | CAUDANTCNG       | Frontal     | -0.13 (-0.23 to -0.04)  | 0.04             |
| medial orbitalfrontal cortex          | MEDORBFRN        | Frontal     | -0.13 (-0.22 to -0.03)  | 0.05             |
| cuneus                                | CUNEUS           | Occipital   | -0.12 (-0.21 to -0.02)  | 0.07             |
| frontal pole                          | FRNPOLE          | Frontal     | -0.11 (-0.21 to -0.02)  | 0.09             |
| ventral diencephalon                  | VENTRALDC        | Subcortical | -0.11 (-0.20 to -0.01)  | 0.10             |
| pericalcarine cortex                  | PERICLCRN        | Occipital   | -0.09 (-0.18 to 0.01)   | 0.19             |
| precentral gyrus                      | PRECNTRL         | Frontal     | -0.07 (-0.17 to 0.02)   | 0.26             |
| pallidum                              | PALLIDUM         | Subcortical | 0.05 (-0.05 to 0.14)    | 0.46             |
| transverse temporal gyrus             | TRANSTMP         | Temporal    | -0.04 (-0.14 to 0.05)   | 0.49             |
| caudate                               | CAUD             | Subcortical | -0.03 (-0.12 to 0.07)   | 0.67             |
| paracentral gyrus                     | PARACNTRL        | Frontal     | 0.00 (-0.09 to 0.10)    | 0.95             |

**Supplemental Table 20. Correlations between CSF pT217/T217 and regional brain volumes for amyloid PET positive individuals in the Knight ADRC amyloid PET cohort.** The partial Spearman correlation after adjusting for age and sex are shown. All tests were two-sided and the significance of correlations was adjusted for comparisons with multiple regions using the Benjamini-Hochberg procedure.

| Region of interest                    | Freesurfer label | Group       | Partial Spearman $\rho$ | Adjusted p-value |
|---------------------------------------|------------------|-------------|-------------------------|------------------|
| hippocampus                           | HIPPOCAMPUS      | Subcortical | -0.43 (-0.51 to -0.35)  | <0.0001          |
| entorhinal                            | ENTORHINAL       | Temporal    | -0.35 (-0.44 to -0.27)  | <0.0001          |
| amygdala                              | AMYGDALA         | Subcortical | -0.34 (-0.43 to -0.26)  | <0.0001          |
| parahippocampal gyrus                 | PARAHPCMPL       | Temporal    | -0.33 (-0.42 to -0.25)  | <0.0001          |
| temporal pole                         | TMPPOLE          | Temporal    | -0.28 (-0.37 to -0.19)  | <0.0001          |
| middle temporal gyrus                 | MIDTMP           | Temporal    | -0.28 (-0.37 to -0.19)  | <0.0001          |
| fusiform gyrus                        | FUSIFORM         | Temporal    | -0.28 (-0.36 to -0.19)  | <0.0001          |
| inferior temporal gyrus               | INFRTMP          | Temporal    | -0.27 (-0.36 to -0.18)  | <0.0001          |
| inferior parietal cortex              | INFRPRTL         | Parietal    | -0.25 (-0.34 to -0.16)  | 0.0002           |
| banks of the superior temporal sulcus | SSTSBANK         | Temporal    | -0.19 (-0.29 to -0.10)  | 0.006            |
| precuneus                             | PRECUNEUS        | Parietal    | -0.16 (-0.25 to -0.06)  | 0.04             |
| superior parietal cortex              | SUPERPRTL        | Parietal    | -0.15 (-0.24 to -0.05)  | 0.05             |
| lingual gyrus                         | LINGUAL          | Occipital   | -0.15 (-0.24 to -0.05)  | 0.06             |
| supramarginal gyrus                   | SUPRAMRGNL       | Parietal    | -0.13 (-0.22 to -0.03)  | 0.12             |
| ventral diencephalon                  | VENTRALDC        | Subcortical | -0.11 (-0.20 to -0.01)  | 0.21             |
| putamen                               | PUTAMEN          | Subcortical | -0.11 (-0.20 to -0.01)  | 0.21             |
| frontal pole                          | FRNPOLE          | Frontal     | -0.10 (-0.20 to -0.01)  | 0.24             |
| isthmus of the cingulate gyrus        | ISTHMUSCNG       | Parietal    | -0.09 (-0.18 to 0.01)   | 0.33             |
| paracentral gyrus                     | PARACNTRL        | Frontal     | 0.09 (-0.01 to 0.18)    | 0.33             |
| lateral occipital cortex              | LATOCC           | Occipital   | -0.09 (-0.18 to 0.01)   | 0.33             |
| pars orbitalis                        | PARSORBLS        | Frontal     | -0.08 (-0.18 to 0.01)   | 0.35             |
| rostral anterior cingulate            | ROSANTCNG        | Frontal     | -0.08 (-0.18 to 0.01)   | 0.35             |
| pericalcarine cortex                  | PERICLCRN        | Occipital   | -0.07 (-0.17 to 0.02)   | 0.44             |
| transverse temporal gyrus             | TRANSTMP         | Temporal    | 0.07 (-0.03 to 0.16)    | 0.45             |
| insula                                | INSULA           | Insula      | -0.07 (-0.16 to 0.03)   | 0.45             |
| cuneus                                | CUNEUS           | Occipital   | -0.07 (-0.16 to 0.03)   | 0.45             |
| caudal anterior cingulate gyrus       | CAUDANTCNG       | Frontal     | -0.06 (-0.16 to 0.03)   | 0.45             |
| posterior cingulate gyrus             | POSTCNG          | Parietal    | -0.06 (-0.16 to 0.03)   | 0.45             |
| pallidum                              | PALLIDUM         | Subcortical | 0.06 (-0.04 to 0.16)    | 0.46             |
| precentral gyrus                      | PRECNTRL         | Frontal     | 0.05 (-0.04 to 0.15)    | 0.54             |
| lateral orbitofrontal cortex          | LATORBFRN        | Frontal     | -0.05 (-0.14 to 0.05)   | 0.60             |
| caudate                               | CAUD             | Subcortical | -0.04 (-0.14 to 0.05)   | 0.62             |
| rostral middle frontal cortex         | ROSMIDFRN        | Frontal     | -0.04 (-0.14 to 0.05)   | 0.62             |
| superior temporal cortex              | SUPERTMP         | Temporal    | -0.04 (-0.14 to 0.06)   | 0.62             |
| thalamus                              | THALAMUS         | Subcortical | -0.04 (-0.13 to 0.06)   | 0.62             |
| postcentral gyrus                     | POSTCNTRL        | Parietal    | -0.03 (-0.12 to 0.07)   | 0.74             |
| caudal middle frontal gyrus           | CAUDMIDFRN       | Frontal     | -0.03 (-0.12 to 0.07)   | 0.74             |
| pars triangularis                     | PARSTRNGLRS      | Frontal     | 0.02 (-0.07 to 0.12)    | 0.79             |
| pars opercularis                      | PARAOPRCLRS      | Frontal     | -0.02 (-0.11 to 0.08)   | 0.80             |
| superior frontal cortex               | SUPERFRN         | Frontal     | -0.02 (-0.11 to 0.08)   | 0.81             |
| medial orbitalfrontal cortex          | MEDORBFRN        | Frontal     | 0.00 (-0.09 to 0.10)    | 0.94             |



**Supplemental Table 21. Correlations between CSF pT181/T181 and regional brain volumes for amyloid PET positive individuals in the Knight ADRC amyloid PET cohort.** The partial Spearman correlation after adjusting for age and sex are shown. All tests were two-sided and the significance of correlations was adjusted for comparisons with multiple regions using the Benjamini-Hochberg procedure.

| Region of interest                    | Freesurfer label | Group       | Partial Spearman $\rho$ | Adjusted p-value |
|---------------------------------------|------------------|-------------|-------------------------|------------------|
| hippocampus                           | HIPPOCAMPUS      | Subcortical | -0.18 (-0.27 to -0.08)  | 0.15             |
| amygdala                              | AMYGDALA         | Subcortical | -0.15 (-0.24 to -0.05)  | 0.34             |
| parahippocampal gyrus                 | PARAHPCMPL       | Temporal    | -0.13 (-0.23 to -0.04)  | 0.40             |
| temporal pole                         | TMPPOLE          | Temporal    | -0.13 (-0.22 to -0.03)  | 0.40             |
| frontal pole                          | FRNPOLE          | Frontal     | -0.12 (-0.21 to -0.02)  | 0.42             |
| entorhinal                            | ENTORHINAL       | Temporal    | -0.11 (-0.21 to -0.02)  | 0.42             |
| precentral gyrus                      | PRECNTL          | Frontal     | 0.11 (0.01 to 0.20)     | 0.42             |
| fusiform gyrus                        | FUSIFORM         | Temporal    | -0.11 (-0.20 to -0.01)  | 0.42             |
| thalamus                              | THALAMUS         | Subcortical | 0.10 (0.00 to 0.20)     | 0.44             |
| posterior cingulate gyrus             | POSTCNG          | Parietal    | 0.10 (0.00 to 0.19)     | 0.44             |
| paracentral gyrus                     | PARACNTRL        | Frontal     | 0.09 (0.00 to 0.19)     | 0.50             |
| medial orbitofrontal cortex           | MEDORBFRN        | Frontal     | 0.09 (-0.01 to 0.18)    | 0.53             |
| pallidum                              | PALLIDUM         | Subcortical | 0.08 (-0.02 to 0.17)    | 0.65             |
| pars triangularis                     | PARSTRNGLRS      | Frontal     | 0.07 (-0.02 to 0.17)    | 0.65             |
| superior temporal cortex              | SUPERTMP         | Temporal    | 0.07 (-0.03 to 0.16)    | 0.65             |
| caudal middle frontal gyrus           | CAUDMIDFRN       | Frontal     | 0.07 (-0.03 to 0.16)    | 0.65             |
| inferior temporal gyrus               | INFRTMP          | Temporal    | -0.07 (-0.16 to 0.03)   | 0.65             |
| middle temporal gyrus                 | MIDTMP           | Temporal    | -0.07 (-0.16 to 0.03)   | 0.65             |
| ventral diencephalon                  | VENTRALDC        | Subcortical | 0.06 (-0.04 to 0.16)    | 0.71             |
| inferior parietal cortex              | INFRPRTL         | Parietal    | -0.05 (-0.15 to 0.04)   | 0.76             |
| lingual gyrus                         | LINGUAL          | Occipital   | -0.05 (-0.15 to 0.04)   | 0.76             |
| transverse temporal gyrus             | TRANSTMP         | Temporal    | 0.05 (-0.05 to 0.15)    | 0.78             |
| postcentral gyrus                     | POSTCNTRL        | Parietal    | 0.05 (-0.05 to 0.14)    | 0.82             |
| isthmus of the cingulate gyrus        | ISTHMUSCNG       | Parietal    | 0.04 (-0.05 to 0.14)    | 0.85             |
| lateral occipital cortex              | LATOCC           | Occipital   | 0.04 (-0.06 to 0.13)    | 0.88             |
| cuneus                                | CUNEUS           | Occipital   | -0.04 (-0.13 to 0.06)   | 0.88             |
| insula                                | INSULA           | Insula      | 0.03 (-0.07 to 0.13)    | 0.88             |
| superior parietal cortex              | SUPERPRTL        | Parietal    | -0.03 (-0.13 to 0.07)   | 0.88             |
| pars opercularis                      | PARAOPRCLRS      | Frontal     | 0.03 (-0.07 to 0.12)    | 0.88             |
| lateral orbitofrontal cortex          | LATORBFRN        | Frontal     | 0.03 (-0.07 to 0.12)    | 0.88             |
| caudal anterior cingulate gyrus       | CAUDANTCNG       | Frontal     | 0.03 (-0.07 to 0.12)    | 0.88             |
| pericalcarine cortex                  | PERICLCRN        | Occipital   | -0.02 (-0.12 to 0.07)   | 0.88             |
| putamen                               | PUTAMEN          | Subcortical | -0.02 (-0.12 to 0.07)   | 0.88             |
| banks of the superior temporal sulcus | SSTSBANK         | Temporal    | -0.02 (-0.11 to 0.08)   | 0.89             |
| rostral anterior cingulate            | ROSANTCNG        | Frontal     | 0.02 (-0.08 to 0.11)    | 0.89             |
| rostral middle frontal cortex         | ROSMIDFRN        | Frontal     | 0.02 (-0.08 to 0.11)    | 0.89             |
| superior frontal cortex               | SUPERFRN         | Frontal     | 0.02 (-0.08 to 0.11)    | 0.89             |
| caudate                               | CAUD             | Subcortical | -0.01 (-0.11 to 0.08)   | 0.89             |
| supramarginal gyrus                   | SUPRAMRGNL       | Parietal    | -0.01 (-0.11 to 0.08)   | 0.89             |
| pars orbitalis                        | PARSORBLS        | Frontal     | -0.01 (-0.10 to 0.09)   | 0.95             |
| precuneus                             | PRECUNEUS        | Parietal    | 0.00 (-0.10 to 0.1)     | 0.98             |

**Supplemental Table 22. Correlations between CSF pT231/T231 and regional brain volumes for amyloid PET positive individuals in the Knight ADRC amyloid PET cohort.** The partial Spearman correlation after adjusting for age and sex are shown. All tests were two-sided and the significance of correlations was adjusted for comparisons with multiple regions using the Benjamini-Hochberg procedure.

| Region of interest                    | Freesurfer label | Group       | Partial Spearman $\rho$ | Adjusted p-value |
|---------------------------------------|------------------|-------------|-------------------------|------------------|
| fusiform gyrus                        | FUSIFORM         | Temporal    | -0.19 (-0.28 to -0.09)  | 0.17             |
| parahippocampal gyrus                 | PARAHPCMPL       | Temporal    | -0.14 (-0.24 to -0.04)  | 0.48             |
| hippocampus                           | HIPPOCAMPUS      | Subcortical | -0.13 (-0.23 to -0.03)  | 0.48             |
| inferior parietal cortex              | INFRPRTL         | Parietal    | -0.13 (-0.22 to -0.03)  | 0.48             |
| entorhinal                            | ENTORHINAL       | Temporal    | -0.12 (-0.22 to -0.02)  | 0.48             |
| temporal pole                         | TMPPOLE          | Temporal    | -0.10 (-0.20 to 0.00)   | 0.50             |
| pars triangularis                     | PARSTRNGLRS      | Frontal     | 0.10 (0.00 to 0.20)     | 0.50             |
| cuneus                                | CUNEUS           | Occipital   | -0.10 (-0.20 to 0.00)   | 0.50             |
| thalamus                              | THALAMUS         | Subcortical | 0.10 (0.00 to 0.20)     | 0.50             |
| lateral orbitofrontal cortex          | LATORBFRN        | Frontal     | 0.09 (-0.01 to 0.19)    | 0.50             |
| middle temporal gyrus                 | MIDTMP           | Temporal    | -0.09 (-0.19 to 0.01)   | 0.50             |
| rostral anterior cingulate            | ROSANTCNG        | Frontal     | 0.09 (-0.01 to 0.19)    | 0.50             |
| banks of the superior temporal sulcus | SSTSBANK         | Temporal    | -0.09 (-0.19 to 0.01)   | 0.50             |
| isthmus of the cingulate gyrus        | ISTHMUSCNG       | Parietal    | 0.09 (-0.01 to 0.19)    | 0.50             |
| insula                                | INSULA           | Insula      | 0.09 (-0.01 to 0.18)    | 0.50             |
| inferior temporal gyrus               | INFRTMP          | Temporal    | -0.08 (-0.18 to 0.02)   | 0.50             |
| postcentral gyrus                     | POSTCNTRL        | Parietal    | 0.08 (-0.02 to 0.18)    | 0.50             |
| posterior cingulate gyrus             | POSTCNG          | Parietal    | 0.08 (-0.02 to 0.18)    | 0.50             |
| precentral gyrus                      | PRECNTRL         | Frontal     | 0.08 (-0.02 to 0.18)    | 0.50             |
| transverse temporal gyrus             | TRANSTMP         | Temporal    | 0.08 (-0.02 to 0.18)    | 0.50             |
| rostral middle frontal cortex         | ROSMIDFRN        | Frontal     | 0.07 (-0.03 to 0.17)    | 0.51             |
| caudal middle frontal gyrus           | CAUDMIDFRN       | Frontal     | 0.06 (-0.05 to 0.15)    | 0.70             |
| supramarginal gyrus                   | SUPRAMRGNL       | Parietal    | 0.05 (-0.05 to 0.15)    | 0.70             |
| lingual gyrus                         | LINGUAL          | Occipital   | -0.05 (-0.15 to 0.05)   | 0.70             |
| pericalcarine cortex                  | PERICLCRN        | Occipital   | -0.05 (-0.15 to 0.05)   | 0.71             |
| superior parietal cortex              | SUPERPRTL        | Parietal    | -0.05 (-0.15 to 0.05)   | 0.71             |
| amygdala                              | AMYGDALA         | Subcortical | -0.05 (-0.15 to 0.05)   | 0.71             |
| putamen                               | PUTAMEN          | Subcortical | 0.04 (-0.06 to 0.14)    | 0.72             |
| superior frontal cortex               | SUPERFRN         | Frontal     | 0.04 (-0.06 to 0.14)    | 0.72             |
| pallidum                              | PALLIDUM         | Subcortical | 0.04 (-0.06 to 0.14)    | 0.74             |
| medial orbitalfrontal cortex          | MEDORBFRN        | Frontal     | 0.04 (-0.06 to 0.14)    | 0.76             |
| superior temporal cortex              | SUPERTMP         | Temporal    | 0.03 (-0.07 to 0.14)    | 0.76             |
| ventral diencephalon                  | VENTRALDC        | Subcortical | -0.03 (-0.13 to 0.07)   | 0.79             |
| lateral occipital cortex              | LATOCC           | Occipital   | 0.03 (-0.07 to 0.13)    | 0.79             |
| caudate                               | CAUD             | Subcortical | 0.02 (-0.08 to 0.12)    | 0.83             |
| caudal anterior cingulate gyrus       | CAUDANTCNG       | Frontal     | -0.02 (-0.12 to 0.08)   | 0.83             |
| precuneus                             | PRECUNEUS        | Parietal    | -0.02 (-0.12 to 0.08)   | 0.83             |
| paracentral gyrus                     | PARACNTRL        | Frontal     | 0.02 (-0.08 to 0.12)    | 0.84             |
| pars orbitalis                        | PARSORBLS        | Frontal     | 0.02 (-0.08 to 0.12)    | 0.84             |
| pars opercularis                      | PARAOPRCLRS      | Frontal     | 0.01 (-0.09 to 0.12)    | 0.84             |
| frontal pole                          | FRNPOLE          | Frontal     | 0.00 (-0.10 to 0.10)    | 0.98             |

**Supplemental Table 23. Correspondence of CSF measures with clinical status in the Knight ADRC amyloid PET cohort.** The receiver operating characteristic area under the curve for clinical status (cognitively unimpaired [CDR=0] or cognitively impaired [CDR>0]) as predicted by biomarkers without and with covariates of age, sex, and years of education. CSF measures are shown in order of the best prediction of individuals who were cognitively impaired, stratified by measure type.

| Analyte                                                                          | AUC without covariates<br>(95% CI) | AUC with covariates<br>(95% CI) |
|----------------------------------------------------------------------------------|------------------------------------|---------------------------------|
| <b>CSF Lumipulse measures</b>                                                    |                                    |                                 |
| p-tau181 (pg/ml)                                                                 | 0.81 (0.76 to 0.85)                | 0.83 (0.79 to 0.87)             |
| Aβ42/Aβ40                                                                        | 0.81 (0.77 to 0.85)                | 0.82 (0.78 to 0.86)             |
| Total tau (pg/ml)                                                                | 0.79 (0.74 to 0.83)                | 0.80 (0.76 to 0.84)             |
| Aβ42 (pg/ml)                                                                     | 0.77 (0.72 to 0.82)                | 0.79 (0.75 to 0.84)             |
| Aβ40 (pg/ml)                                                                     | 0.51 (0.46 to 0.57)                | 0.68 (0.64 to 0.73)             |
| <b>Amyloid and tau PET measures</b>                                              |                                    |                                 |
| Tau PET summary measure                                                          | 0.85 (0.78 to 0.91)                | 0.91 (0.86 to 0.95)             |
| Amyloid PET Centiloid                                                            | 0.83 (0.78 to 0.87)                | 0.86 (0.82 to 0.90)             |
| <b>Phosphorylation occupancies by mass spectrometry</b>                          |                                    |                                 |
| pT217/T217 (%)                                                                   | 0.84 (0.80 to 0.89)                | 0.87 (0.83 to 0.91)             |
| pT111/T111 (%)                                                                   | 0.82 (0.78 to 0.86)                | 0.84 (0.80 to 0.88)             |
| pT205/T205 (%)                                                                   | 0.81 (0.77 to 0.86)                | 0.85 (0.81 to 0.88)             |
| pT153/T153 (%)                                                                   | 0.81 (0.77 to 0.85)                | 0.83 (0.79 to 0.87)             |
| pS208/S208 (%)                                                                   | 0.80 (0.76 to 0.85)                | 0.83 (0.80 to 0.87)             |
| pT181/T181 (%)                                                                   | 0.80 (0.75 to 0.85)                | 0.83 (0.79 to 0.87)             |
| pT231/T231 (%)                                                                   | 0.79 (0.74 to 0.84)                | 0.81 (0.77 to 0.85)             |
| pS202/S202 (%)                                                                   | 0.64 (0.59 to 0.70)                | 0.73 (0.68 to 0.78)             |
| pS199/S199 (%)                                                                   | 0.57 (0.51 to 0.62)                | 0.70 (0.66 to 0.75)             |
| pT175/T175 (%)                                                                   | 0.55 (0.49 to 0.60)                | 0.70 (0.65 to 0.74)             |
| <b>Phosphorylated Non-phosphorylated tau concentrations by mass spectrometry</b> |                                    |                                 |
| p-tau205 (pg/ml)                                                                 | 0.84 (0.80 to 0.88)                | 0.86 (0.83 to 0.90)             |
| p-tau217 (pg/ml)                                                                 | 0.83 (0.79 to 0.88)                | 0.86 (0.82 to 0.90)             |
| p-tau153 (pg/ml)                                                                 | 0.82 (0.78 to 0.86)                | 0.83 (0.79 to 0.86)             |
| p-tau208 (pg/ml)                                                                 | 0.82 (0.77 to 0.86)                | 0.85 (0.81 to 0.88)             |
| p-tau231 (pg/ml)                                                                 | 0.81 (0.76 to 0.85)                | 0.82 (0.78 to 0.86)             |
| p-tau181 (pg/ml)                                                                 | 0.78 (0.73 to 0.82)                | 0.81 (0.77 to 0.85)             |
| p-tau199 (pg/ml)                                                                 | 0.73 (0.68 to 0.78)                | 0.78 (0.74 to 0.82)             |
| p-tau202 (pg/ml)                                                                 | 0.72 (0.67 to 0.77)                | 0.77 (0.73 to 0.81)             |
| p-tau175 (pg/ml)                                                                 | 0.65 (0.60 to 0.71)                | 0.72 (0.68 to 0.77)             |
| <b>Non-phosphorylated tau concentrations by mass spectrometry</b>                |                                    |                                 |
| Tau195-210 (ng/ml)                                                               | 0.75 (0.70 to 0.80)                | 0.79 (0.75 to 0.84)             |
| Tau226-230 (ng/ml)                                                               | 0.75 (0.70 to 0.79)                | 0.78 (0.73 to 0.82)             |
| Tau151-155 (ng/ml)                                                               | 0.74 (0.70 to 0.79)                | 0.78 (0.74 to 0.83)             |
| Tau181-190 (ng/ml)                                                               | 0.73 (0.68 to 0.78)                | 0.78 (0.74 to 0.82)             |
| Tau212-221 (ng/ml)                                                               | 0.72 (0.67 to 0.77)                | 0.77 (0.73 to 0.81)             |

**Supplemental Table 24. Correspondence of CSF measures with clinical status in the amyloid PET positive individuals in the Knight ADRC amyloid PET cohort.** The receiver operating characteristic area under the curve for clinical status (cognitively unimpaired [CDR=0] or cognitively impaired [CDR>0] as predicted by biomarkers without and with covariates of age, sex, and years of education. CSF measures are shown in order of the best prediction of individuals who were cognitively impaired, stratified by measure type.

| Analyte                                                                          | AUC without covariates<br>(95% CI) | AUC with covariates<br>(95% CI) |
|----------------------------------------------------------------------------------|------------------------------------|---------------------------------|
| <b>CSF Lumipulse measures</b>                                                    |                                    |                                 |
| p-tau181 (pg/ml)                                                                 | 0.69 (0.62 to 0.75)                | 0.71 (0.65 to 0.78)             |
| A $\beta$ 42 (pg/ml)                                                             | 0.68 (0.61 to 0.74)                | 0.71 (0.64 to 0.77)             |
| Total tau (pg/ml)                                                                | 0.66 (0.59 to 0.73)                | 0.70 (0.63 to 0.76)             |
| A $\beta$ 42/A $\beta$ 40                                                        | 0.64 (0.57 to 0.71)                | 0.68 (0.62 to 0.75)             |
| A $\beta$ 40 (pg/ml)                                                             | 0.60 (0.53 to 0.67)                | 0.66 (0.59 to 0.72)             |
| <b>Amyloid and tau PET measures</b>                                              |                                    |                                 |
| Tau PET summary measure                                                          | 0.86 (0.78 to 0.94)                | 0.89 (0.82 to 0.95)             |
| Amyloid PET Centiloid                                                            | 0.77 (0.71 to 0.83)                | 0.79 (0.74 to 0.85)             |
| <b>Phosphorylation occupancies by mass spectrometry</b>                          |                                    |                                 |
| pT217/T217 (%)                                                                   | 0.80 (0.74 to 0.85)                | 0.82 (0.76 to 0.87)             |
| pT205/T205 (%)                                                                   | 0.79 (0.73 to 0.84)                | 0.81 (0.75 to 0.86)             |
| pT111/T111 (%)                                                                   | 0.69 (0.62 to 0.75)                | 0.71 (0.64 to 0.77)             |
| pS208/S208 (%)                                                                   | 0.68 (0.61 to 0.74)                | 0.71 (0.65 to 0.77)             |
| pT181/T181 (%)                                                                   | 0.67 (0.61 to 0.74)                | 0.69 (0.63 to 0.76)             |
| pT153/T153 (%)                                                                   | 0.64 (0.58 to 0.71)                | 0.68 (0.62 to 0.75)             |
| pT231/T231 (%)                                                                   | 0.61 (0.54 to 0.68)                | 0.64 (0.57 to 0.71)             |
| pS202/S202 (%)                                                                   | 0.57 (0.50 to 0.64)                | 0.63 (0.56 to 0.69)             |
| pT175/T175 (%)                                                                   | 0.56 (0.48 to 0.63)                | 0.61 (0.54 to 0.68)             |
| pS199/S199 (%)                                                                   | 0.52 (0.45 to 0.59)                | 0.62 (0.55 to 0.69)             |
| <b>Phosphorylated Non-phosphorylated tau concentrations by mass spectrometry</b> |                                    |                                 |
| p-tau205 (pg/ml)                                                                 | 0.78 (0.72 to 0.84)                | 0.80 (0.74 to 0.85)             |
| p-tau217 (pg/ml)                                                                 | 0.75 (0.69 to 0.81)                | 0.76 (0.70 to 0.82)             |
| p-tau208 (pg/ml)                                                                 | 0.71 (0.65 to 0.78)                | 0.73 (0.66 to 0.79)             |
| p-tau231 (pg/ml)                                                                 | 0.66 (0.59 to 0.73)                | 0.66 (0.59 to 0.73)             |
| p-tau153 (pg/ml)                                                                 | 0.65 (0.58 to 0.72)                | 0.68 (0.61 to 0.74)             |
| p-tau181 (pg/ml)                                                                 | 0.65 (0.58 to 0.71)                | 0.68 (0.61 to 0.74)             |
| p-tau199 (pg/ml)                                                                 | 0.63 (0.56 to 0.70)                | 0.67 (0.60 to 0.73)             |
| p-tau202 (pg/ml)                                                                 | 0.63 (0.56 to 0.70)                | 0.67 (0.60 to 0.73)             |
| p-tau175 (pg/ml)                                                                 | 0.55 (0.48 to 0.62)                | 0.62 (0.55 to 0.69)             |
| <b>Non-phosphorylated tau concentrations by mass spectrometry</b>                |                                    |                                 |
| Tau195-210 (ng/ml)                                                               | 0.64 (0.57 to 0.70)                | 0.68 (0.62 to 0.75)             |
| Tau226-230 (ng/ml)                                                               | 0.62 (0.55 to 0.69)                | 0.67 (0.60 to 0.73)             |
| Tau151-155 (ng/ml)                                                               | 0.61 (0.54 to 0.68)                | 0.66 (0.59 to 0.72)             |
| Tau181-190 (ng/ml)                                                               | 0.61 (0.54 to 0.68)                | 0.66 (0.60 to 0.73)             |
| Tau212-221 (ng/ml)                                                               | 0.60 (0.54 to 0.67)                | 0.66 (0.59 to 0.72)             |

**Supplemental Table 25. Correlations between biomarker measures and Clinical Dementia Rating Sum of Boxes for the Knight ADRC amyloid PET cohort.** The Spearman correlation and partial Spearman correlation after adjusting for age, sex, and years of education are shown. CSF measures are shown in order of the absolute value of their correlation with Clinical Dementia Rating Sum of Boxes, stratified by measure type. All tests were two-sided and were not adjusted for multiple comparisons.

| Measure                                                           | n=  | Spearman $\rho$        | p=      | Partial Spearman $\rho$ | p=      |
|-------------------------------------------------------------------|-----|------------------------|---------|-------------------------|---------|
| <b>CSF Lumipulse measures</b>                                     |     |                        |         |                         |         |
| p-tau181 (pg/ml)                                                  | 750 | 0.39 (0.33 to 0.45)    | <0.0001 | 0.34 (0.28 to 0.40)     | <0.0001 |
| A $\beta$ 42/A $\beta$ 40                                         | 750 | -0.38 (-0.44 to -0.32) | <0.0001 | -0.34 (-0.40 to -0.28)  | <0.0001 |
| Total tau (pg/ml)                                                 | 750 | 0.36 (0.30 to 0.42)    | <0.0001 | 0.32 (0.25 to 0.38)     | <0.0001 |
| A $\beta$ 42 (pg/ml)                                              | 750 | -0.34 (-0.40 to -0.27) | <0.0001 | -0.31 (-0.37 to -0.24)  | <0.0001 |
| A $\beta$ 40 (pg/ml)                                              | 750 | -0.02 (-0.09 to 0.05)  | 0.60    | -0.05 (-0.12 to 0.03)   | 0.21    |
| <b>Amyloid and tau PET measures</b>                               |     |                        |         |                         |         |
| Tau PET summary measure                                           | 361 | 0.43 (0.35 to 0.51)    | <0.0001 | 0.42 (0.33 to 0.50)     | <0.0001 |
| Amyloid PET Centiloid                                             | 750 | 0.39 (0.33 to 0.45)    | <0.0001 | 0.36 (0.29 to 0.42)     | <0.0001 |
| <b>Phosphorylation occupancies by mass spectrometry</b>           |     |                        |         |                         |         |
| pT217/T217 (%)                                                    | 750 | 0.43 (0.37 to 0.48)    | <0.0001 | 0.38 (0.31 to 0.44)     | <0.0001 |
| pT111/T111 (%)                                                    | 746 | 0.40 (0.33 to 0.46)    | <0.0001 | 0.35 (0.29 to 0.41)     | <0.0001 |
| pT153/T153 (%)                                                    | 660 | 0.39 (0.33 to 0.46)    | <0.0001 | 0.35 (0.29 to 0.42)     | <0.0001 |
| pT205/T205 (%)                                                    | 749 | 0.39 (0.33 to 0.45)    | <0.0001 | 0.34 (0.28 to 0.40)     | <0.0001 |
| pS208/S208 (%)                                                    | 685 | 0.38 (0.32 to 0.45)    | <0.0001 | 0.34 (0.27 to 0.40)     | <0.0001 |
| pT231/T231 (%)                                                    | 620 | 0.38 (0.31 to 0.44)    | <0.0001 | 0.34 (0.26 to 0.40)     | <0.0001 |
| pT181/T181 (%)                                                    | 747 | 0.36 (0.30 to 0.42)    | <0.0001 | 0.32 (0.25 to 0.38)     | <0.0001 |
| pS202/S202 (%)                                                    | 750 | -0.18 (-0.25 to -0.11) | <0.0001 | -0.16 (-0.23 to -0.09)  | <0.0001 |
| pT175/T175 (%)                                                    | 734 | -0.08 (-0.15 to -0.01) | 0.03    | -0.08 (-0.15 to -0.01)  | 0.03    |
| pS199/S199 (%)                                                    | 743 | 0.08 (0.00 to 0.15)    | 0.04    | 0.04 (-0.04 to 0.11)    | 0.31    |
| <b>Phosphorylated tau concentrations by mass spectrometry</b>     |     |                        |         |                         |         |
| p-tau205 (pg/ml)                                                  | 749 | 0.43 (0.37 to 0.49)    | <0.0001 | 0.38 (0.32 to 0.44)     | <0.0001 |
| p-tau217 (pg/ml)                                                  | 750 | 0.42 (0.36 to 0.48)    | <0.0001 | 0.38 (0.31 to 0.44)     | <0.0001 |
| p-tau153 (pg/ml)                                                  | 660 | 0.41 (0.34 to 0.47)    | <0.0001 | 0.37 (0.30 to 0.43)     | <0.0001 |
| p-tau208 (pg/ml)                                                  | 685 | 0.40 (0.34 to 0.46)    | <0.0001 | 0.35 (0.29 to 0.42)     | <0.0001 |
| p-tau231 (pg/ml)                                                  | 619 | 0.40 (0.33 to 0.46)    | <0.0001 | 0.36 (0.29 to 0.43)     | <0.0001 |
| p-tau181 (pg/ml)                                                  | 747 | 0.35 (0.29 to 0.42)    | <0.0001 | 0.31 (0.24 to 0.37)     | <0.0001 |
| p-tau199 (pg/ml)                                                  | 743 | 0.29 (0.22 to 0.35)    | <0.0001 | 0.23 (0.16 to 0.30)     | <0.0001 |
| p-tau202 (pg/ml)                                                  | 750 | 0.28 (0.22 to 0.35)    | <0.0001 | 0.23 (0.16 to 0.30)     | <0.0001 |
| p-tau175 (pg/ml)                                                  | 734 | 0.19 (0.12 to 0.26)    | <0.0001 | 0.15 (0.08 to 0.22)     | <0.0001 |
| <b>Non-phosphorylated tau concentrations by mass spectrometry</b> |     |                        |         |                         |         |
| Tau195-210 (ng/ml)                                                | 750 | 0.33 (0.26 to 0.39)    | <0.0001 | 0.28 (0.21 to 0.35)     | <0.0001 |
| Tau151-155 (ng/ml)                                                | 747 | 0.32 (0.25 to 0.38)    | <0.0001 | 0.27 (0.20 to 0.34)     | <0.0001 |
| Tau226-230 (ng/ml)                                                | 719 | 0.31 (0.24 to 0.37)    | <0.0001 | 0.26 (0.19 to 0.33)     | <0.0001 |
| Tau181-190 (ng/ml)                                                | 750 | 0.30 (0.23 to 0.36)    | <0.0001 | 0.25 (0.19 to 0.32)     | <0.0001 |
| Tau212-221 (ng/ml)                                                | 750 | 0.29 (0.22 to 0.36)    | <0.0001 | 0.24 (0.17 to 0.31)     | <0.0001 |

**Supplemental Table 26. Correlations between biomarker measures and Clinical Dementia Rating Sum of Boxes for amyloid PET positive individuals in the Knight ADRC amyloid PET cohort.** The Spearman correlation and partial Spearman correlation after adjusting for age, sex, and years of education are shown. CSF measures are shown in order of the absolute value of their correlation with Clinical Dementia Rating Sum of Boxes, stratified by measure type. All tests were two-sided and were not adjusted for multiple comparisons.

| Measure                                                           | n=  | Spearman $\rho$        | p=      | Partial Spearman $\rho$ | p=      |
|-------------------------------------------------------------------|-----|------------------------|---------|-------------------------|---------|
| <b>CSF Lumipulse measures</b>                                     |     |                        |         |                         |         |
| p-tau181 (pg/ml)                                                  | 263 | 0.33 (0.22 to 0.43)    | <0.0001 | 0.32 (0.21 to 0.42)     | <0.0001 |
| A $\beta$ 42 (pg/ml)                                              | 263 | -0.30 (-0.40 to -0.18) | <0.0001 | -0.28 (-0.38 to -0.16)  | <0.0001 |
| Total tau (pg/ml)                                                 | 263 | 0.29 (0.18 to 0.40)    | <0.0001 | 0.28 (0.17 to 0.39)     | <0.0001 |
| A $\beta$ 42/A $\beta$ 40                                         | 263 | -0.23 (-0.34 to -0.12) | 0.0001  | -0.22 (-0.33 to -0.10)  | 0.0004  |
| A $\beta$ 40 (pg/ml)                                              | 263 | -0.17 (-0.28 to -0.05) | 0.006   | -0.16 (-0.27 to -0.03)  | 0.01    |
| <b>Amyloid and tau PET measures</b>                               |     |                        |         |                         |         |
| Tau PET summary measure                                           | 124 | 0.65 (0.54 to 0.74)    | <0.0001 | 0.65 (0.54 to 0.74)     | <0.0001 |
| Amyloid PET Centiloid                                             | 263 | 0.42 (0.31 to 0.51)    | <0.0001 | 0.42 (0.32 to 0.52)     | <0.0001 |
| <b>Phosphorylation occupancies by mass spectrometry</b>           |     |                        |         |                         |         |
| pT217/T217 (%)                                                    | 263 | 0.50 (0.41 to 0.59)    | <0.0001 | 0.49 (0.39 to 0.58)     | <0.0001 |
| pT205/T205 (%)                                                    | 263 | 0.50 (0.40 to 0.59)    | <0.0001 | 0.48 (0.38 to 0.57)     | <0.0001 |
| pT111/T111 (%)                                                    | 263 | 0.32 (0.21 to 0.43)    | <0.0001 | 0.30 (0.18 to 0.40)     | <0.0001 |
| pS208/S208 (%)                                                    | 260 | 0.31 (0.20 to 0.42)    | <0.0001 | 0.28 (0.16 to 0.39)     | <0.0001 |
| pT181/T181 (%)                                                    | 262 | 0.28 (0.16 to 0.39)    | <0.0001 | 0.26 (0.14 to 0.37)     | <0.0001 |
| pT153/T153 (%)                                                    | 261 | 0.23 (0.11 to 0.34)    | 0.0002  | 0.22 (0.11 to 0.34)     | 0.0003  |
| pT231/T231 (%)                                                    | 240 | 0.20 (0.08 to 0.32)    | 0.0015  | 0.20 (0.07 to 0.32)     | 0.002   |
| pT175/T175 (%)                                                    | 257 | -0.13 (-0.25 to -0.01) | 0.04    | -0.12 (-0.24 to 0.01)   | 0.06    |
| pS202/S202 (%)                                                    | 263 | -0.12 (-0.23 to 0.00)  | 0.06    | -0.13 (-0.25 to -0.01)  | 0.03    |
| pS199/S199 (%)                                                    | 263 | 0.06 (-0.06 to 0.18)   | 0.33    | 0.02 (-0.10 to 0.15)    | 0.69    |
| <b>Phosphorylated tau concentrations by mass spectrometry</b>     |     |                        |         |                         |         |
| p-tau205 (pg/ml)                                                  | 263 | 0.49 (0.40 to 0.58)    | <0.0001 | 0.47 (0.37 to 0.56)     | <0.0001 |
| p-tau217 (pg/ml)                                                  | 263 | 0.44 (0.34 to 0.53)    | <0.0001 | 0.43 (0.32 to 0.52)     | <0.0001 |
| p-tau208 (pg/ml)                                                  | 260 | 0.38 (0.27 to 0.48)    | <0.0001 | 0.35 (0.24 to 0.46)     | <0.0001 |
| p-tau231 (pg/ml)                                                  | 239 | 0.29 (0.17 to 0.40)    | <0.0001 | 0.28 (0.16 to 0.39)     | <0.0001 |
| p-tau181 (pg/ml)                                                  | 262 | 0.26 (0.15 to 0.37)    | <0.0001 | 0.25 (0.13 to 0.36)     | <0.0001 |
| p-tau153 (pg/ml)                                                  | 261 | 0.25 (0.14 to 0.36)    | <0.0001 | 0.25 (0.13 to 0.36)     | <0.0001 |
| p-tau199 (pg/ml)                                                  | 263 | 0.24 (0.12 to 0.35)    | <0.0001 | 0.21 (0.10 to 0.33)     | 0.0005  |
| p-tau202 (pg/ml)                                                  | 263 | 0.24 (0.12 to 0.35)    | <0.0001 | 0.22 (0.10 to 0.33)     | 0.0004  |
| p-tau175 (pg/ml)                                                  | 257 | 0.08 (-0.04 to 0.20)   | 0.19    | 0.09 (-0.03 to 0.21)    | 0.15    |
| <b>Non-phosphorylated tau concentrations by mass spectrometry</b> |     |                        |         |                         |         |
| Tau195-210 (ng/ml)                                                | 263 | 0.25 (0.13 to 0.36)    | <0.0001 | 0.25 (0.13 to 0.36)     | <0.0001 |
| Tau226-230 (ng/ml)                                                | 259 | 0.23 (0.11 to 0.34)    | 0.0002  | 0.22 (0.10 to 0.33)     | 0.0004  |
| Tau181-190 (ng/ml)                                                | 263 | 0.21 (0.09 to 0.32)    | 0.0007  | 0.20 (0.08 to 0.32)     | 0.0009  |
| Tau212-221 (ng/ml)                                                | 263 | 0.20 (0.09 to 0.32)    | 0.0008  | 0.20 (0.08 to 0.31)     | 0.001   |
| Tau151-155 (ng/ml)                                                | 261 | 0.20 (0.08 to 0.31)    | 0.001   | 0.19 (0.07 to 0.31)     | 0.002   |

**Supplemental Table 27. CSF tau measures for cognitively impaired individuals in the Knight ADRC tau PET cohort.** Continuous values are presented as the median with the interquartile range. The significance of differences by amyloid PET status were evaluated with Wilcoxon ranked sum tests for continuous variables and Chi-Square or Fisher exact tests for categorical variables. The fold difference is the median biomarker value in the tau PET positive group divided by the median value in the tau PET negative group. All tests were two-sided and were not adjusted for multiple comparisons.

| Characteristic                                                    | All (n=55)           | Tau PET negative (n=20) | Tau PET positive (n=35) | Fold Change | p=      |
|-------------------------------------------------------------------|----------------------|-------------------------|-------------------------|-------------|---------|
| <b>Phosphorylation occupancies by mass spectrometry</b>           |                      |                         |                         |             |         |
| pT111/T111 (%)                                                    | 8.66 (6.29-10.5)     | 4.93 (3.56-8.4)         | 9.73 (8.13-11.1)        | 1.97        | 0.0002  |
| pT153/T153 (%)                                                    | 0.144 (0.0934-0.209) | 0.0889 (0.0613-0.111)   | 0.175 (0.142-0.211)     | 1.97        | 0.0003  |
| pT175/T175 (%)                                                    | 0.427 (0.367-0.501)  | 0.458 (0.395-0.557)     | 0.426 (0.34-0.458)      | 0.93        | 0.08    |
| pT181/T181 (%)                                                    | 36.2 (32-37.9)       | 32.0 (27.9-34.2)        | 36.8 (35.3-40.2)        | 1.15        | 0.0004  |
| pS199/S199 (%)                                                    | 0.695 (0.557-0.893)  | 0.613 (0.465-0.893)     | 0.726 (0.617-0.891)     | 1.18        | 0.30    |
| pS202/S202 (%)                                                    | 4.76 (4.28-5.95)     | 5.65 (4.45-6.92)        | 4.62 (3.92-5.19)        | 0.82        | 0.02    |
| pT205/T205 (%)                                                    | 1.40 (1.19-1.7)      | 1.06 (0.804-1.36)       | 1.60 (1.38-1.81)        | 1.51        | <0.0001 |
| pS208/S208 (%)                                                    | 0.272 (0.209-0.331)  | 0.196 (0.112-0.283)     | 0.282 (0.259-0.36)      | 1.44        | 0.001   |
| pT217/T217 (%)                                                    | 11.9 (7.69-13.3)     | 5.69 (3.54-7.96)        | 12.8 (11.8-13.9)        | 2.25        | <0.0001 |
| pT231/T231 (%)                                                    | 26.9 (17.7-31.5)     | 13.6 (6.99-26.7)        | 27.4 (24.3-35.4)        | 2.01        | 0.0005  |
| <b>Phosphorylated tau concentrations by mass spectrometry</b>     |                      |                         |                         |             |         |
| p-tau153 (pg/ml)                                                  | 4.49 (2.53-7.11)     | 2.22 (1.14-4.83)        | 4.78 (4.15-7.67)        | 2.15        | 0.002   |
| p-tau175 (pg/ml)                                                  | 13.4 (10.1-17.2)     | 13.0 (7.57-19.6)        | 13.4 (10.2-15.9)        | 1.03        | 0.96    |
| p-tau181 (pg/ml)                                                  | 1160 (789-1470)      | 789 (643-1180)          | 1220 (944-1530)         | 1.55        | 0.009   |
| p-tau199 (pg/ml)                                                  | 25.5 (16.1-34.5)     | 21.1 (14.8-27.9)        | 27.2 (21.8-34.9)        | 1.29        | 0.03    |
| p-tau202 (pg/ml)                                                  | 176 (139-214)        | 148 (121-190)           | 176 (141-214)           | 1.19        | 0.38    |
| p-tau205 (pg/ml)                                                  | 50.0 (35.3-69.0)     | 30.5 (21.3-43.5)        | 63.8 (45.4-74.3)        | 2.09        | <0.0001 |
| p-tau208 (pg/ml)                                                  | 10.0 (6.18-13.8)     | 5.94 (3.19-9.52)        | 11.3 (9.04-15.2)        | 1.9         | 0.0003  |
| p-tau217 (pg/ml)                                                  | 254 (178-333)        | 136 (64.6-188)          | 300 (231-385)           | 2.21        | <0.0001 |
| p-tau231 (pg/ml)                                                  | 88.4 (53.5-127)      | 33.8 (15.5-71.9)        | 103 (84.2-147)          | 3.05        | <0.0001 |
| <b>Non-phosphorylated tau concentrations by mass spectrometry</b> |                      |                         |                         |             |         |
| Tau151-155 (ng/ml)                                                | 2.80 (2.27-3.59)     | 2.49 (1.93-3.21)        | 3.21 (2.29-3.67)        | 1.29        | 0.09    |
| Tau181-190 (ng/ml)                                                | 3.18 (2.34-3.92)     | 2.85 (1.91-3.21)        | 3.40 (2.42-3.95)        | 1.19        | 0.08    |
| Tau195-210 (ng/ml)                                                | 3.44 (2.76-4.44)     | 3.05 (2.3-3.44)         | 3.91 (2.95-4.53)        | 1.28        | 0.02    |
| Tau212-221 (ng/ml)                                                | 2.33 (1.74-2.78)     | 2.06 (1.47-2.36)        | 2.51 (1.78-2.81)        | 1.22        | 0.14    |
| Tau226-230 (ng/ml)                                                | 0.325 (0.239-0.477)  | 0.243 (0.216-0.31)      | 0.363 (0.289-0.51)      | 1.49        | 0.006   |

**Supplemental Table 28. Correlations between CSF biomarkers and amyloid PET Centiloid for cognitively impaired individuals in the Knight ADRC tau PET cohort.** The Spearman correlation and partial Spearman correlation after adjusting for age and sex are shown. CSF measures are shown in order of the absolute value of their correlation with amyloid PET Centiloid, stratified by measure type. All tests were two-sided and were not adjusted for multiple comparisons.

| Measure                                                           | Spearman $\rho$        | p=      | Partial Spearman $\rho$ | p=      |
|-------------------------------------------------------------------|------------------------|---------|-------------------------|---------|
| <b>CSF Lumipulse measures</b>                                     |                        |         |                         |         |
| A $\beta$ 42 (pg/ml)                                              | -0.61 (-0.75 to -0.41) | <0.0001 | -0.61 (-0.76 to -0.41)  | <0.0001 |
| A $\beta$ 42/A $\beta$ 40                                         | -0.58 (-0.73 to -0.37) | <0.0001 | -0.57 (-0.73 to -0.35)  | <0.0001 |
| p-tau181 (pg/ml)                                                  | 0.47 (0.24 to 0.65)    | 0.0002  | 0.46 (0.22 to 0.65)     | 0.0004  |
| Total tau (pg/ml)                                                 | 0.26 (-0.01 to 0.49)   | 0.05    | 0.24 (-0.03 to 0.48)    | 0.08    |
| A $\beta$ 40 (pg/ml)                                              | -0.24 (-0.48 to 0.02)  | 0.07    | -0.27 (-0.50 to 0.00)   | 0.05    |
| <b>Phosphorylation occupancies by mass spectrometry</b>           |                        |         |                         |         |
| pT217/T217 (%)                                                    | 0.77 (0.63 to 0.86)    | <0.0001 | 0.78 (0.65 to 0.87)     | <0.0001 |
| pT111/T111 (%)                                                    | 0.66 (0.47 to 0.78)    | <0.0001 | 0.66 (0.47 to 0.79)     | <0.0001 |
| pS208/S208 (%)                                                    | 0.62 (0.42 to 0.76)    | <0.0001 | 0.62 (0.42 to 0.76)     | <0.0001 |
| pT181/T181 (%)                                                    | 0.59 (0.38 to 0.74)    | <0.0001 | 0.58 (0.37 to 0.74)     | <0.0001 |
| pT231/T231 (%)                                                    | 0.59 (0.37 to 0.75)    | <0.0001 | 0.58 (0.35 to 0.75)     | <0.0001 |
| pT205/T205 (%)                                                    | 0.57 (0.36 to 0.73)    | <0.0001 | 0.62 (0.42 to 0.76)     | <0.0001 |
| pT153/T153 (%)                                                    | 0.39 (0.13 to 0.60)    | 0.004   | 0.40 (0.14 to 0.61)     | 0.004   |
| pT175/T175 (%)                                                    | -0.36 (-0.57 to -0.10) | 0.006   | -0.38 (-0.59 to -0.12)  | 0.004   |
| pS202/S202 (%)                                                    | -0.19 (-0.43 to 0.08)  | 0.16    | -0.19 (-0.44 to 0.09)   | 0.17    |
| pS199/S199 (%)                                                    | 0.09 (-0.18 to 0.35)   | 0.49    | 0.1 (-0.17 to 0.36)     | 0.46    |
| <b>Phosphorylated tau concentrations by mass spectrometry</b>     |                        |         |                         |         |
| p-tau217 (pg/ml)                                                  | 0.62 (0.42 to 0.76)    | <0.0001 | 0.61 (0.41 to 0.76)     | <0.0001 |
| p-tau205 (pg/ml)                                                  | 0.61 (0.41 to 0.75)    | <0.0001 | 0.61 (0.4 to 0.75)      | <0.0001 |
| p-tau208 (pg/ml)                                                  | 0.55 (0.34 to 0.71)    | <0.0001 | 0.54 (0.32 to 0.71)     | <0.0001 |
| p-tau231 (pg/ml)                                                  | 0.53 (0.29 to 0.71)    | <0.0001 | 0.52 (0.27 to 0.71)     | 0.0001  |
| p-tau181 (pg/ml)                                                  | 0.30 (0.04 to 0.53)    | 0.02    | 0.28 (0.01 to 0.51)     | 0.04    |
| p-tau153 (pg/ml)                                                  | 0.30 (0.03 to 0.53)    | 0.03    | 0.30 (0.02 to 0.53)     | 0.03    |
| p-tau202 (pg/ml)                                                  | 0.23 (-0.03 to 0.47)   | 0.08    | 0.21 (-0.06 to 0.45)    | 0.13    |
| p-tau199 (pg/ml)                                                  | 0.20 (-0.07 to 0.44)   | 0.14    | 0.19 (-0.09 to 0.43)    | 0.18    |
| <b>Non-phosphorylated tau concentrations by mass spectrometry</b> |                        |         |                         |         |
| Tau195-209 (ng/ml)                                                | 0.27 (0.01 to 0.5)     | 0.04    | 0.25 (-0.02 to 0.49)    | 0.07    |
| Tau226-230 (ng/ml)                                                | 0.27 (0.01 to 0.5)     | 0.04    | 0.26 (-0.01 to 0.5)     | 0.06    |
| Tau151-155 (ng/ml)                                                | 0.18 (-0.09 to 0.43)   | 0.18    | 0.15 (-0.12 to 0.41)    | 0.27    |
| Tau181-190 (ng/ml)                                                | 0.16 (-0.11 to 0.41)   | 0.23    | 0.14 (-0.14 to 0.39)    | 0.33    |
| Tau212-221 (ng/ml)                                                | 0.15 (-0.12 to 0.4)    | 0.28    | 0.12 (-0.15 to 0.38)    | 0.38    |



**Supplemental Table 29. Correlations between CSF biomarkers and the tau PET summary measure for cognitively impaired individuals in the Knight ADRC tau PET cohort.** The Spearman correlation and partial Spearman correlation after adjusting for age and sex are shown. CSF measures are shown in order of the absolute value of their correlation with the Tau PET Summary Measure, stratified by measure type. All tests were two-sided and were not adjusted for multiple comparisons.

| Measure                                                           | Spearman $\rho$        | p=      | Partial Spearman $\rho$ | p=      |
|-------------------------------------------------------------------|------------------------|---------|-------------------------|---------|
| <b>CSF Lumipulse measures</b>                                     |                        |         |                         |         |
| A $\beta$ 42 (pg/ml)                                              | -0.59 (-0.74 to -0.39) | <0.0001 | -0.61 (-0.76 to -0.41)  | <0.0001 |
| A $\beta$ 42/A $\beta$ 40                                         | -0.48 (-0.66 to -0.25) | 0.0001  | -0.53 (-0.70 to -0.30)  | <0.0001 |
| p-tau181 (pg/ml)                                                  | 0.44 (0.20 to 0.63)    | 0.0005  | 0.50 (0.26 to 0.68)     | 0.0001  |
| A $\beta$ 40 (pg/ml)                                              | -0.33 (-0.54 to -0.07) | 0.01    | -0.33 (-0.55 to -0.06)  | 0.01    |
| Total tau (pg/ml)                                                 | 0.32 (0.06 to 0.54)    | 0.01    | 0.39 (0.13 to 0.60)     | 0.003   |
| <b>Phosphorylation occupancies by mass spectrometry</b>           |                        |         |                         |         |
| pT217/T217 (%)                                                    | 0.71 (0.55 to 0.82)    | <0.0001 | 0.73 (0.58 to 0.84)     | <0.0001 |
| pT205/T205 (%)                                                    | 0.67 (0.50 to 0.80)    | <0.0001 | 0.66 (0.47 to 0.79)     | <0.0001 |
| pS208/S208 (%)                                                    | 0.49 (0.26 to 0.67)    | 0.0001  | 0.52 (0.29 to 0.69)     | <0.0001 |
| pT231/T231 (%)                                                    | 0.48 (0.22 to 0.67)    | 0.0004  | 0.52 (0.27 to 0.7)      | 0.0001  |
| pT153/T153 (%)                                                    | 0.46 (0.21 to 0.65)    | 0.0004  | 0.51 (0.27 to 0.69)     | 0.0001  |
| pT111/T111 (%)                                                    | 0.45 (0.21 to 0.64)    | 0.0004  | 0.48 (0.25 to 0.67)     | 0.0002  |
| pT181/T181 (%)                                                    | 0.42 (0.18 to 0.62)    | 0.001   | 0.47 (0.23 to 0.66)     | 0.0003  |
| pT175/175 (%)                                                     | -0.26 (-0.49 to 0.01)  | 0.05    | -0.22 (-0.47 to 0.05)   | 0.10    |
| pS202/S202 (%)                                                    | -0.20 (-0.44 to 0.07)  | 0.14    | -0.26 (-0.5 to 0.01)    | 0.06    |
| pS199/S199 (%)                                                    | 0.15 (-0.12 to 0.4)    | 0.26    | 0.15 (-0.12 to 0.4)     | 0.28    |
| <b>Phosphorylated tau concentrations by mass spectrometry</b>     |                        |         |                         |         |
| p-tau205 (pg/ml)                                                  | 0.62 (0.42 to 0.76)    | <0.0001 | 0.64 (0.44 to 0.77)     | <0.0001 |
| p-tau217 (pg/ml)                                                  | 0.59 (0.38 to 0.74)    | <0.0001 | 0.64 (0.44 to 0.77)     | <0.0001 |
| p-tau231 (pg/ml)                                                  | 0.53 (0.29 to 0.71)    | <0.0001 | 0.57 (0.33 to 0.74)     | <0.0001 |
| p-tau208 (pg/ml)                                                  | 0.47 (0.23 to 0.65)    | 0.0002  | 0.54 (0.31 to 0.7)      | <0.0001 |
| p-tau153 (pg/ml)                                                  | 0.36 (0.09 to 0.58)    | 0.008   | 0.42 (0.16 to 0.63)     | 0.002   |
| p-tau181 (pg/ml)                                                  | 0.30 (0.03 to 0.52)    | 0.03    | 0.38 (0.12 to 0.59)     | 0.004   |
| p-tau199 (pg/ml)                                                  | 0.26 (-0.01 to 0.49)   | 0.05    | 0.28 (0.01 to 0.51)     | 0.04    |
| p-tau202 (pg/ml)                                                  | 0.13 (-0.14 to 0.38)   | 0.34    | 0.16 (-0.11 to 0.42)    | 0.24    |
| p-tau175 (pg/ml)                                                  | -0.04 (-0.3 to 0.23)   | 0.79    | 0.03 (-0.24 to 0.3)     | 0.84    |
| <b>Non-phosphorylated tau concentrations by mass spectrometry</b> |                        |         |                         |         |
| Tau226-230 (ng/ml)                                                | 0.31 (0.04 to 0.53)    | 0.02    | 0.33 (0.07 to 0.56)     | 0.01    |
| Tau195-209 (ng/ml)                                                | 0.26 (-0.01 to 0.49)   | 0.06    | 0.32 (0.06 to 0.55)     | 0.02    |
| Tau181-190 (ng/ml)                                                | 0.16 (-0.11 to 0.41)   | 0.23    | 0.23 (-0.04 to 0.47)    | 0.10    |
| Tau151-155 (ng/ml)                                                | 0.15 (-0.12 to 0.4)    | 0.28    | 0.20 (-0.07 to 0.45)    | 0.14    |
| Tau212-221 (ng/ml)                                                | 0.14 (-0.13 to 0.39)   | 0.29    | 0.20 (-0.07 to 0.45)    | 0.14    |

**Supplemental Table 30. Correlations between CSF biomarkers and amyloid PET Centiloid for individuals in the BioFINDER-2 cohort.** The Spearman correlation and partial Spearman correlation after adjusting for age and sex are shown. CSF measures are shown in order of the absolute value of their correlation with amyloid PET Centiloid, stratified by measure type. All tests were two-sided and were not adjusted for multiple comparisons.

| Measure                                                           | Spearman $\rho$       | p=      | Partial Spearman $\rho$ | p=      |
|-------------------------------------------------------------------|-----------------------|---------|-------------------------|---------|
| <b>CSF NeuroTool Kit measures</b>                                 |                       |         |                         |         |
| p-tau181 (pg/ml)                                                  | 0.24 (0.03 to 0.42)   | 0.02    | 0.21 (0.00 to 0.40)     | 0.05    |
| A $\beta$ 42/A $\beta$ 40                                         | -0.19 (-0.38 to 0.02) | 0.08    | -0.18 (-0.37 to 0.03)   | 0.10    |
| Total tau (pg/ml)                                                 | 0.16 (-0.05 to 0.35)  | 0.14    | 0.11 (-0.10 to 0.32)    | 0.29    |
| A $\beta$ 42 (pg/ml)                                              | -0.13 (-0.33 to 0.08) | 0.21    | -0.18 (-0.37 to 0.03)   | 0.10    |
| A $\beta$ 40 (pg/ml)                                              | -0.06 (-0.27 to 0.15) | 0.56    | -0.12 (-0.32 to 0.09)   | 0.26    |
| <b>Phosphorylation occupancies by mass spectrometry</b>           |                       |         |                         |         |
| pT217/T217 (%)                                                    | 0.55 (0.38 to 0.68)   | <0.0001 | 0.58 (0.42 to 0.70)     | <0.0001 |
| pT181/T181 (%)                                                    | 0.50 (0.33 to 0.64)   | <0.0001 | 0.52 (0.34 to 0.65)     | <0.0001 |
| pT153/T153 (%)                                                    | 0.49 (0.32 to 0.63)   | <0.0001 | 0.53 (0.36 to 0.67)     | <0.0001 |
| pT111/T111 (%)                                                    | 0.46 (0.28 to 0.61)   | <0.0001 | 0.47 (0.28 to 0.61)     | <0.0001 |
| pT205/T205 (%)                                                    | 0.44 (0.26 to 0.60)   | <0.0001 | 0.51 (0.33 to 0.65)     | <0.0001 |
| pS208/S208 (%)                                                    | 0.43 (0.25 to 0.59)   | <0.0001 | 0.47 (0.29 to 0.62)     | <0.0001 |
| pT231/T231 (%)                                                    | 0.43 (0.25 to 0.59)   | <0.0001 | 0.46 (0.27 to 0.61)     | <0.0001 |
| pS199/S199 (%)                                                    | 0.11 (-0.10 to 0.31)  | 0.31    | 0.15 (-0.06 to 0.35)    | 0.17    |
| pS202/S202 (%)                                                    | -0.09 (-0.29 to 0.12) | 0.38    | -0.07 (-0.27 to 0.14)   | 0.52    |
| <b>Phosphorylated tau concentrations by mass spectrometry</b>     |                       |         |                         |         |
| p-tau205 (pg/ml)                                                  | 0.47 (0.29 to 0.62)   | <0.0001 | 0.48 (0.31 to 0.63)     | <0.0001 |
| p-tau217 (pg/ml)                                                  | 0.45 (0.26 to 0.60)   | <0.0001 | 0.45 (0.26 to 0.60)     | <0.0001 |
| p-tau208 (pg/ml)                                                  | 0.44 (0.26 to 0.60)   | <0.0001 | 0.44 (0.26 to 0.60)     | <0.0001 |
| p-tau153 (pg/ml)                                                  | 0.43 (0.25 to 0.59)   | <0.0001 | 0.43 (0.24 to 0.59)     | <0.0001 |
| p-tau231 (pg/ml)                                                  | 0.36 (0.16 to 0.53)   | 0.0004  | 0.35 (0.15 to 0.52)     | 0.0008  |
| p-tau181 (pg/ml)                                                  | 0.31 (0.11 to 0.49)   | 0.003   | 0.29 (0.09 to 0.47)     | 0.006   |
| p-tau199 (pg/ml)                                                  | 0.28 (0.07 to 0.46)   | 0.008   | 0.26 (0.06 to 0.45)     | 0.01    |
| p-tau202 (pg/ml)                                                  | 0.20 (0.00 to 0.39)   | 0.05    | 0.18 (-0.03 to 0.37)    | 0.10    |
| <b>Non-phosphorylated tau concentrations by mass spectrometry</b> |                       |         |                         |         |
| Tau195-210 (ng/ml)                                                | 0.22 (0.02 to 0.41)   | 0.03    | 0.19 (-0.02 to 0.38)    | 0.08    |
| Tau151-155 (ng/ml)                                                | 0.18 (-0.02 to 0.38)  | 0.08    | 0.15 (-0.06 to 0.35)    | 0.16    |
| Tau181-190 (ng/ml)                                                | 0.17 (-0.04 to 0.37)  | 0.10    | 0.13 (-0.08 to 0.33)    | 0.21    |
| Tau226-230 (ng/ml)                                                | 0.17 (-0.04 to 0.36)  | 0.11    | 0.13 (-0.08 to 0.33)    | 0.23    |
| Tau212-221 (ng/ml)                                                | 0.16 (-0.05 to 0.36)  | 0.12    | 0.11 (-0.10 to 0.32)    | 0.29    |

**Supplemental Table 31. Correlations between CSF biomarkers and tau PET for Braak I-IV regions for individuals in BioFINDER-2 cohort.** The Spearman correlation and partial Spearman correlation after adjusting for age and sex are shown. CSF measures are shown in order of the absolute value of their correlation with tau PET, stratified by measure type. All tests were two-sided and were not adjusted for multiple comparisons.

| Measure                                                           | Spearman $\rho$        | p=      | Partial Spearman $\rho$ | p=      |
|-------------------------------------------------------------------|------------------------|---------|-------------------------|---------|
| <b>CSF NeuroTool Kit measures</b>                                 |                        |         |                         |         |
| p-tau181 (pg/ml)                                                  | 0.42 (0.23 to 0.57)    | <0.0001 | 0.44 (0.26 to 0.60)     | <0.0001 |
| A $\beta$ 42/A $\beta$ 40                                         | -0.33 (-0.50 to -0.13) | 0.002   | -0.33 (-0.50 to -0.13)  | 0.002   |
| Total tau (pg/ml)                                                 | 0.32 (0.13 to 0.50)    | 0.002   | 0.36 (0.16 to 0.53)     | 0.0005  |
| A $\beta$ 42 (pg/ml)                                              | -0.22 (-0.41 to -0.02) | 0.03    | -0.23 (-0.42 to -0.02)  | 0.03    |
| A $\beta$ 40 (pg/ml)                                              | -0.03 (-0.24 to 0.18)  | 0.77    | -0.02 (-0.23 to 0.19)   | 0.83    |
| <b>Phosphorylation occupancies by mass spectrometry</b>           |                        |         |                         |         |
| pT217/T217 (%)                                                    | 0.76 (0.65 to 0.83)    | <0.0001 | 0.76 (0.65 to 0.83)     | <0.0001 |
| pT205/T205 (%)                                                    | 0.72 (0.60 to 0.81)    | <0.0001 | 0.72 (0.60 to 0.81)     | <0.0001 |
| pT181/T181 (%)                                                    | 0.59 (0.43 to 0.71)    | <0.0001 | 0.59 (0.43 to 0.71)     | <0.0001 |
| pS208/S208 (%)                                                    | 0.57 (0.41 to 0.70)    | <0.0001 | 0.57 (0.40 to 0.69)     | <0.0001 |
| pT231/T231 (%)                                                    | 0.48 (0.31 to 0.63)    | <0.0001 | 0.48 (0.30 to 0.63)     | <0.0001 |
| pT153/T153 (%)                                                    | 0.42 (0.24 to 0.58)    | <0.0001 | 0.42 (0.23 to 0.58)     | <0.0001 |
| pT111/T111 (%)                                                    | 0.33 (0.13 to 0.50)    | 0.001   | 0.33 (0.13 to 0.50)     | 0.002   |
| pS199/S199 (%)                                                    | 0.14 (-0.07 to 0.33)   | 0.20    | 0.13 (-0.08 to 0.33)    | 0.22    |
| pS202/S202 (%)                                                    | -0.12 (-0.32 to 0.09)  | 0.25    | -0.13 (-0.33 to 0.09)   | 0.24    |
| <b>Phosphorylated tau concentrations by mass spectrometry</b>     |                        |         |                         |         |
| p-tau205 (pg/ml)                                                  | 0.77 (0.67 to 0.84)    | <0.0001 | 0.78 (0.68 to 0.85)     | <0.0001 |
| p-tau208 (pg/ml)                                                  | 0.65 (0.52 to 0.76)    | <0.0001 | 0.66 (0.52 to 0.76)     | <0.0001 |
| p-tau217 (pg/ml)                                                  | 0.65 (0.52 to 0.76)    | <0.0001 | 0.66 (0.53 to 0.77)     | <0.0001 |
| p-tau199 (pg/ml)                                                  | 0.56 (0.39 to 0.68)    | <0.0001 | 0.57 (0.41 to 0.69)     | <0.0001 |
| p-tau153 (pg/ml)                                                  | 0.52 (0.35 to 0.66)    | <0.0001 | 0.53 (0.35 to 0.66)     | <0.0001 |
| p-tau231 (pg/ml)                                                  | 0.50 (0.32 to 0.64)    | <0.0001 | 0.51 (0.33 to 0.65)     | <0.0001 |
| p-tau181 (pg/ml)                                                  | 0.49 (0.31 to 0.63)    | <0.0001 | 0.51 (0.34 to 0.65)     | <0.0001 |
| p-tau202 (pg/ml)                                                  | 0.46 (0.27 to 0.61)    | <0.0001 | 0.47 (0.29 to 0.62)     | <0.0001 |
| <b>Non-phosphorylated tau concentrations by mass spectrometry</b> |                        |         |                         |         |
| Tau195-210 (ng/ml)                                                | 0.43 (0.24 to 0.58)    | <0.0001 | 0.46 (0.28 to 0.61)     | <0.0001 |
| Tau151-155 (ng/ml)                                                | 0.38 (0.19 to 0.55)    | 0.0002  | 0.41 (0.22 to 0.57)     | <0.0001 |
| Tau181-190 (ng/ml)                                                | 0.37 (0.18 to 0.54)    | 0.0003  | 0.40 (0.21 to 0.57)     | <0.0001 |
| Tau226-230 (ng/ml)                                                | 0.37 (0.18 to 0.54)    | 0.0003  | 0.40 (0.21 to 0.56)     | <0.0001 |
| Tau212-221 (ng/ml)                                                | 0.32 (0.13 to 0.50)    | 0.002   | 0.37 (0.17 to 0.54)     | 0.0004  |

**Supplemental Table 32. Correlations between CSF biomarkers and tau PET for Braak V-VI regions for individuals in BioFINDER-2 cohort.** The Spearman correlation and partial Spearman correlation after adjusting for age and sex are shown. CSF measures are shown in order of the absolute value of their correlation with tau PET, stratified by measure type. All tests were two-sided and were not adjusted for multiple comparisons.

| Measure                                                           | Spearman $\rho$        | p=      | Partial Spearman $\rho$ | p=      |
|-------------------------------------------------------------------|------------------------|---------|-------------------------|---------|
| <b>CSF NeuroTool Kit measures</b>                                 |                        |         |                         |         |
| p-tau181 (pg/ml)                                                  | 0.23 (0.02 to 0.42)    | 0.03    | 0.28 (0.08 to 0.47)     | 0.007   |
| A $\beta$ 42 (pg/ml)                                              | -0.23 (-0.42 to -0.02) | 0.03    | -0.2 (-0.4 to 0.01)     | 0.06    |
| A $\beta$ 42/A $\beta$ 40                                         | -0.20 (-0.39 to 0.01)  | 0.05    | -0.22 (-0.41 to -0.01)  | 0.04    |
| Total tau (pg/ml)                                                 | 0.15 (-0.06 to 0.35)   | 0.15    | 0.22 (0.01 to 0.41)     | 0.04    |
| A $\beta$ 40 (pg/ml)                                              | -0.11 (-0.31 to 0.1)   | 0.32    | -0.06 (-0.27 to 0.15)   | 0.56    |
| <b>Phosphorylation occupancies by mass spectrometry</b>           |                        |         |                         |         |
| pT205/T205 (%)                                                    | 0.66 (0.52 to 0.76)    | <0.0001 | 0.64 (0.50 to 0.75)     | <0.0001 |
| pT217/T217 (%)                                                    | 0.59 (0.43 to 0.71)    | <0.0001 | 0.58 (0.43 to 0.71)     | <0.0001 |
| pS208/S208 (%)                                                    | 0.49 (0.32 to 0.63)    | <0.0001 | 0.48 (0.30 to 0.62)     | <0.0001 |
| pT181/T181 (%)                                                    | 0.44 (0.25 to 0.59)    | <0.0001 | 0.44 (0.25 to 0.59)     | <0.0001 |
| pT231/T231 (%)                                                    | 0.42 (0.23 to 0.58)    | <0.0001 | 0.41 (0.22 to 0.57)     | <0.0001 |
| pT153/T153 (%)                                                    | 0.38 (0.19 to 0.55)    | 0.0002  | 0.37 (0.17 to 0.53)     | 0.0004  |
| pT111/T111 (%)                                                    | 0.21 (0.01 to 0.40)    | 0.04    | 0.22 (0.01 to 0.41)     | 0.04    |
| pS199/S199 (%)                                                    | 0.16 (-0.05 to 0.36)   | 0.13    | 0.13 (-0.08 to 0.33)    | 0.22    |
| pS202/S202 (%)                                                    | -0.05 (-0.25 to 0.16)  | 0.66    | -0.07 (-0.28 to 0.14)   | 0.50    |
| <b>Phosphorylated tau concentrations by mass spectrometry</b>     |                        |         |                         |         |
| p-tau205 (pg/ml)                                                  | 0.58 (0.43 to 0.70)    | <0.0001 | 0.60 (0.45 to 0.72)     | <0.0001 |
| p-tau208 (pg/ml)                                                  | 0.46 (0.28 to 0.61)    | <0.0001 | 0.48 (0.30 to 0.63)     | <0.0001 |
| p-tau217 (pg/ml)                                                  | 0.44 (0.26 to 0.60)    | <0.0001 | 0.47 (0.29 to 0.62)     | <0.0001 |
| p-tau199 (pg/ml)                                                  | 0.36 (0.17 to 0.53)    | 0.0004  | 0.40 (0.20 to 0.56)     | 0.0001  |
| p-tau153 (pg/ml)                                                  | 0.35 (0.15 to 0.52)    | 0.0006  | 0.37 (0.17 to 0.54)     | 0.0003  |
| p-tau231 (pg/ml)                                                  | 0.33 (0.14 to 0.51)    | 0.001   | 0.36 (0.17 to 0.53)     | 0.0004  |
| p-tau202 (pg/ml)                                                  | 0.29 (0.09 to 0.47)    | 0.005   | 0.34 (0.14 to 0.51)     | 0.001   |
| p-tau181 (pg/ml)                                                  | 0.29 (0.09 to 0.47)    | 0.005   | 0.34 (0.14 to 0.52)     | 0.0009  |
| <b>Non-phosphorylated tau concentrations by mass spectrometry</b> |                        |         |                         |         |
| Tau195-210 (ng/ml)                                                | 0.24 (0.03 to 0.42)    | 0.02    | 0.30 (0.10 to 0.48)     | 0.004   |
| Tau151-155 (ng/ml)                                                | 0.21 (0.00 to 0.40)    | 0.05    | 0.27 (0.06 to 0.45)     | 0.01    |
| Tau181-190 (ng/ml)                                                | 0.19 (-0.02 to 0.38)   | 0.07    | 0.26 (0.05 to 0.44)     | 0.01    |
| Tau226-230 (ng/ml)                                                | 0.18 (-0.02 to 0.38)   | 0.08    | 0.25 (0.04 to 0.44)     | 0.02    |
| Tau212-221 (ng/ml)                                                | 0.15 (-0.06 to 0.35)   | 0.15    | 0.23 (0.02 to 0.42)     | 0.03    |

## Appendix 1. Assay methodology, quality control, and performance.

### Assay methodology

CSF tau was immunopurified then digested as previously described and multiple tau phosphorylated peptides and their corresponding non-phosphorylated peptides were quantified using high resolution mass spectrometry (MS)<sup>1</sup>. Prior to immunopurification, 2.5 ng of fully <sup>15</sup>N-labeled 441(2N4R) tau internal standard was mixed with 450 µl of CSF sample in 0.5% NP40, 2.5 mM guanidine and protease inhibitors. Tau was immunopurified by incubating CSF with Tau1 (provided by Drs. Nicholas Kanaan and Lester Binder) and HJ8.5 (provided by Dr. David Holtzman) antibodies at room temperature for 4 hours (3 mg antibody per g of beads)<sup>2</sup>. Immunopurified tau was digested for 16 hours at 37°C with 400 ng of trypsin (Promega). AQUA peptides (Life Technologies, Carlsbad, CA) were added to a final sample concentration of 5 fmol per labeled phosphorylated peptide and 50 fmol per labeled unmodified peptide. The peptide mixture was purified by solid phase extraction on C18 TopTip (Glygen Corp, Columbia, MD). Eluates were dried, resuspended and transferred in MS vials. Samples were subjected to liquid chromatography and tandem high resolution mass spectrometry (LC-MS/HRMS) analysis on a nanoAcquity UPLC system (Waters, Mildford, Massachusetts) coupled to an Orbitrap Tribrid Eclipse MS (Thermo Scientific, San Jose, California) operating in PRM mode. CSF samples were run in batches of approximately 80 samples.

MS/HRMS transitions were extracted using Skyline version 22.2.2.278 (MacCoss lab, University of Washington). Signals not meeting quality criteria (peak not detected, intensity below limit of quantitation, interference on the transition used for quantitation) were not included in further analyses. LC-MS data were aggregated using Tableau version 2022.2.2 (Tableau Software, Seattle, Washington) to calculate concentrations and phosphorylation occupancies. All data extraction steps were performed by operators blinded to any clinical or biomarker information regarding the samples.

CSF tau concentrations were calculated using measured ratios between MS/HRMS transitions of endogenous non-phosphorylated peptides and <sup>15</sup>N labeled peptides from the protein internal standard on peptides 151-155, 181-190, 195-210, 212-221 and 226-230. Phosphorylation occupancies at the T111, T153, T175, T181, S202, T205, S208, T217 and T231 sites were measured using the ratio of the MS/HRMS transitions from phosphorylated peptides (103-126 for pT111; 151-155 for pT153; 171-180 for pT175; 175-190 for pT181; 195-209 for pS202, pT205 and pS208; 212-221 for pT217; 226-234 for pT231) and corresponding non-phosphorylated peptides (103-126 for T111; 151-155 for T153; 181-190 for T181 and T175, 195-209 for S202, T205 and S208; 212-221 for T217; 226-230 for T231). Each phosphorylated/non-phosphorylated peptide endogenous ratio was normalized using the ratio measured on the MS/HRMS transitions of the corresponding AQUA phosphorylated/non-phosphorylated peptide internal standards. The concentration of each p-tau isoform was calculated by multiplying the phosphorylation occupancy and corresponding non-phosphorylated tau concentration. The concentration of p-tau111 was not calculated due to the absence of corresponding 0N specific peptide in the 2N4R <sup>15</sup>N tau internal standard.

To estimate the variance of each CSF tau measure, three pools of CSF were formed that were expected to represent low, intermediate, and high values of p-tau217. Aliquots from these pools were included in each of the 26 batches run over approximately 8 weeks. Notably, pooled samples typically have higher variance than aliquots from single samples. The mean value and the coefficient of variance (mean divided by the standard deviation) for the 26 different batches are shown. The variance was typically higher for the pooled sample representing a low value of p-tau217 compared to the pooled samples representing intermediate or high values of p-tau217. For the intermediate CSF pool, pT231/T231 had higher variance (17.5%) compared to pT217/T217 (3.0%), pT181/T181 (5.8%), and pT205/T205 (9.1%).

**Average values and associated coefficient of variation for three CSF pooled samples.** Three CSF pooled samples designed to have low (normal), intermediate and high (abnormal) p-tau217 concentrations were included in each of 26 sample batches.

|                                                               | Low pool |        | Intermediate pool |        | High pool |        |
|---------------------------------------------------------------|----------|--------|-------------------|--------|-----------|--------|
|                                                               | Mean     | CV (%) | Mean              | CV (%) | Mean      | CV (%) |
| <b>Phosphorylated tau concentrations by mass spectrometry</b> |          |        |                   |        |           |        |
| p-tau217 (pg/ml)                                              | 160      | 9.2    | 690               | 4.7    | 1220      | 7.0    |
| p-tau181 (pg/ml)                                              | 1710     | 11.1   | 3400              | 7.5    | 4720      | 7.2    |
| p-tau202 (pg/ml)                                              | 250      | 11.7   | 350               | 8.2    | 390       | 10.5   |
| p-tau205 (pg/ml)                                              | 40       | 12.7   | 100               | 9.5    | 150       | 10.0   |
| p-tau208 (pg/ml)                                              | 10       | 32.8   | 20                | 14.7   | 40        | 15.8   |
| p-tau199 (pg/ml)                                              | 20       | 35.0   | 60                | 19.0   | 80        | 16.4   |
| p-tau231 (pg/ml)                                              | 40       | 45.6   | 240               | 21.4   | 530       | 28.7   |
| p-tau153 (pg/ml)                                              | 3        | 53.4   | 13                | 22.9   | 25        | 20.4   |
| p-tau175 (pg/ml)                                              | 30       | 32.4   | 40                | 27.6   | 60        | 24.8   |
| <b>Phosphorylation occupancies by mass spectrometry</b>       |          |        |                   |        |           |        |
| pT217/T217 (%)                                                | 3.8      | 5.3    | 11.3              | 3.0    | 15.2      | 5.3    |
| pT181/T181 (%)                                                | 29.1     | 7.8    | 40.2              | 5.8    | 42.2      | 4.9    |
| pS202/S202 (%)                                                | 4.0      | 10.2   | 3.7               | 8.3    | 3.1       | 8.8    |
| pT111/T111 (%)                                                | 3.5      | 10.8   | 8.6               | 7.8    | 10.3      | 7.7    |
| pT205/T205 (%)                                                | 0.65     | 11     | 1.09              | 9.1    | 1.17      | 8.7    |
| pS208/S208 (%)                                                | 0.09     | 29.6   | 0.23              | 16.4   | 0.28      | 16.3   |
| pS199/S199 (%)                                                | 0.71     | 36.7   | 0.59              | 18.4   | 0.59      | 16.1   |
| pT231/T231 (%)                                                | 14.2     | 43.7   | 25.3              | 17.5   | 39.8      | 18.8   |
| pT153/T153 (%)                                                | 0.08     | 49.7   | 0.17              | 19.9   | 0.23      | 20.8   |
| pT175/T175 (%)                                                | 0.5      | 31.2   | 0.5               | 26.8   | 0.5       | 23.9   |
| <b>Tau concentrations by mass spectrometry</b>                |          |        |                   |        |           |        |
| Tau151-155 (ng/ml)                                            | 4.9      | 8.6    | 8.0               | 6.7    | 11.2      | 7.0    |
| Tau181-190 (ng/ml)                                            | 5.9      | 7.5    | 8.4               | 5.0    | 11.2      | 6.2    |
| Tau195-210 (ng/ml)                                            | 6.2      | 5.9    | 9.5               | 3.2    | 12.7      | 4.0    |
| Tau212-221 (ng/ml)                                            | 4.4      | 6.8    | 6.1               | 4.3    | 8.01      | 5.6    |
| Tau226-230 (ng/ml)                                            | 0.7      | 32.1   | 1.1               | 22.7   | 1.51      | 16.9   |

**References:**

1. Barthelemy NR, Toth B, Manser PT, et al. Site-Specific Cerebrospinal Fluid Tau Hyperphosphorylation in Response to Alzheimer's Disease Brain Pathology: Not All Tau Phospho-Sites are Hyperphosphorylated. *Journal of Alzheimer's disease : JAD* 2022; **85**(1): 415-29.
2. Sato C, Barthelemy NR, Mawuenyega KG, et al. Tau Kinetics in Neurons and the Human Central Nervous System. *Neuron* 2018; **98**(4): 861-4.
